# Supplementary material for: AMPAR/TARP stoichiometry differentially modulates channel properties
Source: eLife. 2020 May 26;9:e53946. doi: 10.7554/eLife.53946 (PMC7299370; doi:10.7554/eLife.53946)
Supplement: Figure 1—source data 1. [file elife-53946-fig1-data1.xlsx]

## Sheet: Figure 1B Desensitization
		0 TARPS (GluA1+GFP)			2 TARPs (GluA1 + GluA1:g2)			4 TARPs ( GluA1:g2)
	File	Desensitization weighted time constant (ms)		File	Desensitization weighted time constant (ms)		File	Desensitization weighted time constant (ms)
	14_05_21_0123	2.44513		14_05_09_0015	6.95776		14_07_29_0015	6.50793
	14_05_21_0142	1.91613		16_05_10_0040	2.32087		14_07_29_0027	4.56052
	16_04_29_0004	3.32474		16_05_10_0032	4.01367		14_07_29_0047	7.41139
	16_04_29_0010	2.03065		16_05_25_0084	2.3488		14_09_23_0018	4.76392
	16_05_19_0014	2.24082		16_05_25_0107	3.43191		16_05_05_0046	6.73442
	16_05_19_0037	2.68039		16_05_25_0118	2.83571		16_05_10_0072	5.11611
	16_05_19_0070	1.92743		16_05_25_0119	3.32777		16_05_10_0091	6.26226
	16_05_19_0082	2.40352		16_05_24_0032	3.92337		16_05_10_00114	4.008
	16_05_19_0083	2.09662		16_05_24_0044	4.07882		16_05_10_00134	9.55396
	16_05_19_0097	1.74379		16_05_24_0048	3.62421		16_05_10_00151	6.17926
	16_05_19_0117	3.33049		16_05_24_0060*	4.6195		16_05_20_0000	4.37296
	16_05_19_0136	1.67333		Mean	3.77113		16_05_20_0022	4.9136
	Mean	2.31775		S.E.M	0.385952		16_05_20_0028	4.698
	S.E.M	0.160264		N	11		16_05_25_0000	5.82537
	N	12					16_05_25_0006	7.64107
							16_05_25_0017	8.27804
							16_05_25_0028	8.99616
							16_05_25_0029	7.88823
							16_05_25_0037*	9.22945
							16_05_25_0048*	6.1953
		STATISTICAL ANALYSIS					16_05_25_0049	4.29556
		Comparison	Test	p-value	Graphic		16_05_25_0068	4.87962
		0 TARPs vs 2 TARPs	Student's t-test	0.0017	**		16_05_24_0001	12.0732
		2 TARPs vs 4 TARPs	Student's t-test	0.0001	***		16_05_24_0003	8.92357
		0 TARPs vs 4 TARPs	Student's t-test	<0.0001	****		16_05_24_0020	8.28048
							Mean	6.70353
		STATISTICAL ANALYSIS					S.E.M	0.41379
		Ordinary one-way ANOVA with Newman-Keuls multiple comparisons post-hoc test					N	25
		Comparison	Mean Diff.	Significant?	Summary
		0 TARPs vs 2 TARPs	-1.453	Yes	*
		2 TARPs vs 4 TARPs	-2.933	Yes	****
		0 TARPs vs 4 TARPs	-4.386	Yes	****
		F Value = 32.22
		P Value < 0.0001

## Sheet: Figure 1C % Steady State
		0 TARPS (GluA1+GFP)			2 TARPs (GluA1 + GluA1:g2)			4 TARPs ( GluA1:g2)
	File	% Steady State Current vs. Peak		File	% Steady State Current vs. Peak		File	% Steady State Current vs. Peak
	14_05_21_0123	0.591725		14_05_09_0015	21.368		14_07_29_0027	10.3424
	14_05_21_0142	0.89025		16_05_10_0040	4.03983		14_07_29_0047	23.7058
	16_04_29_0003	0.671719		16_05_10_0032	11.742		14_09_23_0018	7.46817
	16_04_29_0010	0		16_05_25_0084	0.180952		16_05_05_0046	11.4485
	16_05_19_0014	0.449467		16_05_25_0096	7.78669		16_05_10_0072	13.0502
	16_05_19_0037	0.612972		16_05_25_0107	1.81702		16_05_10_0091	36.2947
	16_05_19_0070	7.5429		16_05_25_0118	1.92502		16_05_10_00114	4.648
	16_05_19_0082	7.01773		16_05_25_0119	0.841678		16_05_10_00134	11.8288
	16_05_19_0083	9.29482		16_05_24_0032	3.42774		16_05_10_00151	1.17009
	16_05_19_0097	0.569436		16_05_24_0044	4.75523		16_05_20_0000	7.09829
	16_05_19_0136	2.93002		16_05_24_0048	4.34586		16_05_20_0022	12.7464
	Mean	2.77919		16_05_24_0060*	4.72929		16_05_25_0000	8.69177
	S.E.M.	1.0386		Mean	5.57994		16_05_25_0006	16.4766
	N	11		S.E.M.	1.69927		16_05_25_0017	19.6773
				N	12		16_05_25_0028	29.484
							16_05_25_0029	15.9328
							16_05_25_0037*	20.0247
							16_05_25_0048*	14.5232
							16_05_25_0049	1.4154
							16_05_25_0068	2.06623
		STATISTICAL ANALYSIS					16_05_24_0001	10.2163
		Comparison	Test	p-value	Graphic		16_05_24_0003	19.2504
		0 TARPs vs 4 TARPs	Mann-Whitney U test	<0.0001	****		16_05_24_0020	23.292
		2 TARPs vs 4 TARPs	Mann-Whitney U test	0.0035	**		Mean	13.9501
		0 TARPs vs 2 TARPs	Mann-Whitney U test	0.1027	ns		S.E.M.	1.85238
							N	23
		STATISTICAL ANALYSIS
		Ordinary one-way ANOVA with Newman-Keuls multiple comparisons post-hoc test
		Comparison	Mean Diff.	Significant?	Summary
		0 TARPs vs 4 TARPs	-11.17	Yes	***
		2 TARPs vs 4 TARPs	-8.369	Yes	**
		0 TARPs vs 2 TARPs	-2.803	No	ns
		F Value = 10.86
		P Value = 0.0002

## Sheet: Figure 1D Rise-Time
		0 TARPS (GluA1+GFP)			2 TARPs (GluA1 + GluA1:g2)			4 TARPs ( GluA1:g2)
	File	Rise time (ms)		File	Rise time (ms)		File	Rise time (ms)
	14_05_21_0123	1.05733		14_05_09_0015	1.60957		14_07_29_0015	0.691376
	14_05_21_0142	0.488888		16_05_10_0040	0.404783		14_07_29_0027	0.752316
	16_04_29_0003	0.384342		16_05_25_0084	0.728183		14_07_29_0047	0.690427
	16_04_29_0004	0.762774		16_05_25_0096	0.325663		14_09_23_0018	2.15859
	16_04_29_0010	0.392609		16_05_25_0107	0.355087		16_05_05_0046	0.536318
	16_05_19_0014	0.396194		16_05_25_0118	0.389531		16_05_10_0072	0.426454
	16_05_19_0037	0.405075		16_05_25_0119	0.364482		16_05_10_0091	0.694199
	16_05_19_0070	0.284558		16_05_24_0032	0.400867		16_05_10_00114	0.420343
	16_05_19_0082	0.471172		16_05_24_0044	1.10507		16_05_10_00134	0.340528
	16_05_19_0083	0.443949		16_05_24_0048	0.53751		16_05_10_00151	0.400705
	16_05_19_0097	0.307962		16_05_24_0060*	0.536364		16_05_20_0000	0.339555
	16_05_19_0117	0.219522		Mean	0.614283		16_05_20_0022	0.48192
	16_05_19_0136	0.386625		S.E.M.	0.120952		16_05_20_0028	0.664835
	Mean	0.461615		N	11		16_05_25_0000	0.569393
	S.E.M.	0.0611912					16_05_25_0006	0.651112
	N	13					16_05_25_0017	1.35336
							16_05_25_0028	0.630228
							16_05_25_0029	0.324103
							16_05_25_0037*	0.473624
							16_05_25_0048*	0.542229
		STATISTICAL ANALYSIS					16_05_25_0049	0.467819
		Comparison	Test	p-value	Graphic		16_05_25_0068	0.392723
		0 TARPs vs 4 TARPs	Mann-Whitney U-test	0.0167	*		16_05_24_0000	0.82551
		2 TARPs vs 4 TARPs	Mann-Whitney U-test	0.3034	ns		16_05_24_0001	1.24092
		0 TARPs vs 2 TARPs	Mann-Whitney U-test	0.4152	ns		16_05_24_0003	0.75398
							16_05_24_0020	0.516
		STATISTICAL ANALYSIS					Mean	0.666868
		Ordinary one-way ANOVA with Newman-Keuls multiple comparisons post-hoc test					S.E.M.	0.0768745
		Comparison	Mean Diff.	Significant?	Summary		N	26
		0 TARPs vs 4 TARPs	-0.2046	No	ns
		2 TARPs vs 4 TARPs	-0.0507	No	ns
		0 TARPs vs 2 TARPs	-0.1539	No	ns
		F Value = 1.421
		P Value = 0.2516
