# Supplementary material for: AMPAR/TARP stoichiometry differentially modulates channel properties
Source: eLife. 2020 May 26;9:e53946. doi: 10.7554/eLife.53946 (PMC7299370; doi:10.7554/eLife.53946)
Supplement: Figure 2—source data 1. [file elife-53946-fig2-data1.xlsx]

## Sheet: Figure 2B & 2C Recovery Desens
	GluA1 - 0 TARPs													GluA1 + GluA1:g2 - 2 TARPs																	GluA1:g2 - 4 TARPs
	Interval between pulses	2020_01_31_0035	2020_01_31_0037-43	2020_01_31_0050	2020_01_31_0054	2020_02_06_0038-41	2020_02_06_0064-70	2020_03_13_0022-23	2020_03_13_0027	2020_03_13_0041-42				Interval between pulses	2020_02_13_0038-44	2020_02_20_0037	2020_02_20_0046-52	2020_03_03_0006-8	2020_03_03_0011-14	2020_03_03_0044-46	2020_03_05_0012	2020_03_12_15-18	2020_03_12_54-61	2020_03_12_68-72	2020_03_13_0002-05	2020_03_13_0019	2020_03_13_0053-55				Interval between pulses	2020_01_31_0008	2020_02_06_0015	2020_02_06_0019-21	2020_02_13_0018-20	2020_02_13_0010-15	2020_02_20_0013-15	2020_02_20_0038-40	2020_03_03_0035-42	2020_03_03_54-59	2020_03_03_62-73
	(ms)	First Pulse	First Pulse	First Pulse	First Pulse	First Pulse	First Pulse	First Pulse	First Pulse	First Pulse				(ms)	First Pulse	First Pulse	First Pulse	First Pulse	First Pulse	First Pulse	First Pulse	First Pulse	First Pulse	First Pulse	First Pulse	First Pulse	First Pulse				(ms)	First Pulse	First Pulse	First Pulse	First Pulse	First Pulse	First Pulse	First Pulse	First Pulse	First Pulse	First Pulse
	20	-52.7234	-34.5228	-42.4124	-451.618	-42.9949	-188.152	-139.555	-120.269	-76.3181				20	-263.184	-242.369	-440.997	-278.607	-317.869	-42.0297	-607.518	-90.9424	-163.641	-94.1629	-263.568	-116.173	-788.93				20	-1149.28	-646.077	-755.778	-662.84	-466.186	-1013.41	-250.194	-53.6485	-36.9681	-38.9423
	40	-56.8475	-28.776	-45.8871	-429.698	-36.9063	-186.368	-137.419	-101.376	-86.0988				40	-266.705	-247.605	-456.097	-286.889	-257.311	-43.2081	-642.611	-90.0046	-166.216	-92.681	-256.79	-112.196	-799.633				40	-1121.89	-613.134	-776.455	-660.801	-478.485	-1017.78	-317.55	-51.9508	-37.255	-39.1448
	60	-58.5397	-34.0577	-38.3248	-417.97	-39.7429	-185.855	-135.979	-93.3959	-72.7527				60	-256.201	-212.588	-462.862	-280.348	-391.508	-49.0608	-676.039	-88.2463	-167.09	-97.0323	-237.024	-120.128	-793.122				60	-1090.85	-600.037	-779.501	-661.423	-475.817	-1016.04	-269.045	-50.4614	-37.5057	-36.5151
	80	-55.0587	-30.6935	-44.4012	-382.607	-39.9792	-181.413	-130.997	-87.0174	-71.674				80	-264.135	-191.537	-459.78	-278.302	-390.737	-42.1183	-673.85	-81.6355	-168.3	-94.335	-239.303	-110.302	-803.173				80	-1060.84	-581.957	-788.746	-669.566	-470.136	-1008.37	-251.02	-55.6879	-40.9933	-38.9416
	100	-59.5654	-33.3003	-47.3427	-278.272	-40.9564	-183.297	-136.216	-68.6555	-81.8566				100	-262.147	-209.063	-465.897	-286.122	-453.371	-44.7742	-679.588	-84.3801	-181.523	-95.2603	-231.523	-100.401	-789.382				100	-990.186	-560.015	-788.572	-652.319	-467.245	-1014.81	-269.769	-49.8843	-39.4433	-38.4454
	120	-53.5025	-33.4157	-44.8067	-295.198	-37.1376	-179.912	-133.122	-56.7385	-74.3541				120	-239.505	-192.327	-470.702	-280.659	-461.815	-48.9208	-674.507	-85.7837	-173.421	-87.7603	-209.862	-107.964	-783.336				120	-946.304	-537.806	-795.46	-644.77	-462.433	-1019.57	-259.481	-46.4994	-41.9229	-37.1757
	140	-51.2689	-27.7708	-41.7	-273.647	-41.4574	-185.476	-128.41	-74.3722	-75.7319				140	-261.048	-195.684	-467.151	-277.677	-469.931	-39.1209	-665.841	-88.5687	-162.916	-94.4726	-199.802	-106.223	-775.625				140	-921.068	-516.555	-810.468	-646.006	-459.665	-1029.05	-252.145	-52.5514	-41.1384	-37.2617
	160	-52.0423	-34.6379	-45.4292	-266.629	-39.632	-181.956	-131.607	-70.4563	-78.3154				160	-263.141	-213.922	-461.842	-275.828	-472.802	-39.3677	-689.42	-85.4462	-172.77	-90.7423	-218.536	-106.694	-779.1				160	-903.503	-516.121	-804.653	-647.703	-471.979	-1017.52	-241.53	-50.2369	-42.1237	-40.4907
	180	-55.591	-32.0852	-39.9197	-255.397	-41.6582	-183.121	-133.152	-62.703	-70.4835				180	-243.787	-190.962	-464.554	-260.711	-482.921	-47.0016	-698.859	-84.1638	-172.935	-91.5775	-215.727	-106.197	-781.258				180	-847.859	-483.239	-816.499	-642.787	-457.907	-993.517	-238.877	-45.4684	-42.9724	-35.2755
	200	-54.4215	-33.7972	-40.7262	-260.542	-36.2652	-189.833	-122.457	-54.4573	-69.8369				200	-256.615	-190.43	-464.299	-275.67	-495.782	-46.6043	-674.505	-89.5782	-162.123	-92.4774	-197.181	-102.487	-771.775				200	-807.827	-462.887	-813.28	-642.296	-464.219	-984.779	-236.035	-45.1425	-36.6016	-36.8539
	220	-66.2723	-28.674	-40.3254	-240.508	-34.7838	-182.295	-122.782	-59.9444	-57.3761				220	-256.695	-188.317	-456.999	-263.723	-507.094	-46.8581	-697.339	-79.1962	-166.33	-97.01	-193.043	-90.8979	-767.92				220	-770.978	-447.379	-800.261	-634.112	-456.081	-1006.97	-220.694	-47.4623	-44.6264	-36.9659
	240	-63.8212	-31.8336	-48.1607	-259.416	-33.833	-185.933	-123.694	-65.2291	-67.2444				240	-256.68	-161.899	-450.23	-254.671	-473.356	-47.2569	-670.689	-71.8628	-162.007	-99.4853	-221.067	-94.1235	-771.67				240	-744.658	-192.767	-798.139	-628.073	-456.806	-992.273	-223.632	-48.08	-41.3575	-38.3845
	260	-51.0075	-30.9635	-42.314	-275.14	-36.4906	-188.326	-117.608	-64.9843	-71.7828				260	-254.957	-186.57	-446.864	-258.638	-506.532	-44.9354	-680.312	-76.2788	-170.845	-94.8086	-224.686	-85.5988	-757.795				260	-722.479	-54.734	-797.148	-621.37	-463.36	-1014.85	-231.441	-49.7445	-36.4052	-37.325
	280	-53.4794	-31.2098	-39.5816	-250.874	-37.1031	-184.679	-126.139	-56.4122	-65.7518				280	-265.861	-184.374	-461.182	-258.729	-498.609	-43.1104	-680.071	-80.2602	-171.313	-90.14	-243.306	-81.969	-764.949				280	-690.935	-47.2616	-800.49	-614.357	-457.81	-1003.88	-220.479	-53.518	-38.4774	-38.4801
	300	-52.7828	-30.5095	-39.6272	-253.134	-34.583	-181.504	-115.117	-48.5018	-69.1057				300	-259.221	-161.043	-462.687	-257.855	-469.834	-45.3221	-677.729	-81.9336	-163.062	-86.7098	-234.482	-92.9472	-762.114				300	-667.81	-46.1469	-783.941	-599.181	-460.274	-1000.31	-233.142	-46.0272	-44.2999	-36.5792
	320	-56.4317	-31.763	-35.4226	-233.011	-32.4647	-179.084	-106.055	-34.9744	-67.8729				320	-257.636	-161.689	-463.49	-265.237	-513.334	-42.3358	-644.572	-77.7713	-173.732	-90.2108	-229.571	-83.0321	-757.485				320	-650.001	-47.2083	-773.152	-590.702	-472.646	-993.593	-235.087	-43.7565	-43.884	-38.7937
	340	-63.687	-32.1303	-34.9181	-228.071	-30.5695	-179.73	-111.177	-38.1379	-69.3323				340	-259.168	-144.761	-457.939	-265.509	-388.107	-41.5361	-647.569	-83.3756	-160.153	-87.4187	-226.588	-78.3635	-763.464				340	-630.468	-48.3035	-767.544	-599.361	-460.086	-987.877	-214.794	-46.6939	-40.8731	-39.6164
	360	-55.7791	-31.3921	-36.0161	-233.341	-33.4867	-181.316	-103.891	-23.6859	-79.1976				360	-256.353	-181.292	-460.069	-252.006	-488.205	-35.7549	-652.579	-82.4894	-164.099	-95.3634	-225.084	-86.2799	-754.214				360	-611.105	-43.6358	-759.026	-579.259	-470.481	-982.287	-213.581	-52.5988	-37.7385	-37.7462
	380	-48.8417	-30.1136	-38.6027	-234.332	-31.0895	-178.841	-100.438	-21.2505	-73.221				380	-268.015	-168.068	-452.73	-258.103	-401.045	-37.4278	-647.227	-74.7812	-168.505	-89.6732	-219.878	-66.2737	-757.465				380	-577.224	-51.1848	-750.62	-590.943	-474.058	-1003.09	-225.918	-52.4493	-37.3793	-37.3933
	400	-49.5891	-29.2888	-38.5778	-234.458	-31.6865	-176.062	-103.799	-18.51	-60.8901				400	-263.213	-157.489	-465.227	-258.979	-484.218	-39.1008	-631.332	-84.3164	-162.807	-87.6451	-223.206	-81.0818	-758.852				400	-569.72	-46.6653	-739.798	-570.525	-458.8	-973.599	-222.326	-45.2187	-38.4519	-39.6338
	420	-47.055	-34.8771	-35.6841	-251.036	-33.4529	-173.164	-95.6532	-9.31844	-63.9207				420	-263.952	-147.226	-453.232	-250.311	-466.831	-39.7917	-599.596	-82.0155	-170.944	-98.0261	-217.297	-101.401	-745.685				420	-548.033	-46.3499	-744.94	-569.409	-478.746	-981.96	-206.269	-46.1233	-42.72	-36.1454
	440	-45.4004	-30.4185	-33.9906	-240.603	-30.5591	-175.474	-93.9723		-59.1588				440	-259.895	-121.717	-450.716	-266.21	-469.188	-34.2703	-581.73	-77.2984	-171.222	-89.7444	-207.169	-87.2156	-750.488				440	-518.531	-48.2255	-720.805	-568.063	-455.936	-975.331	-198.57	-46.9955	-45.2253	-38.7665
	460	-47.2059	-30.8795	-40.502	-216.938	-32.5209	-177.219	-90.0147		-64.6429				460	-261.734	-119.174	-439.488	-255.227	-455.15	-36.3864	-590.744	-80.0783	-162.833	-89.2685	-197.199	-99.7723	-736.742				460	-512.536	-44.8478	-721.572	-569.995	-451.418	-978.539	-206.666	-54.6893	-42.2526	-38.0834
	480	-50.8936	-29.686	-33.7445	-234.966	-28.419	-170.17	-91.1834		-55.3214				480	-260.366	-122.764	-371.527	-250.743	-471.954	-42.3298	-552.392	-68.4139	-158.814	-85.4659	-207.765	-92.9351	-740.87				480	-496.585	-48.1499	-722.832	-531.065	-459.927	-967.161	-210.631	-50.2381	-38.9973	-36.7783
	500	-51.3258	-31.6218	-28.3316	-239.371	-30.0813	-170.487	-97.4189		-59.9595				500	-262.668	-104.879	-406.774	-243.032	-466.048	-38.1832	-593.921	-73.3998	-161.589	-91.7943	-195.74	-109.673	-731.936				500	-482.821	-46.9041	-720.348	-519.635	-474.752	-967.539	-206.099	-54.4688	-39.7567	-36.7381
	520	-49.5958	-25.5064	-36.1491	-217.739	-29.5666	-168.503	-89.1452		-63.6639				520	-261.07	-112.101	-413.838	-243.736	-456.989	-32.3728	-544.593	-77.8663	-156.523	-88.2862	-201.112	-125.393	-707.175				520	-484.111	-40.9318	-714.469	-513.538	-456.134	-929.361	-214.05	-49.2298	-37.2049	-39.5812
	540	-52.2857	-27.809	-42.6524	-215.2	-29.9145	-169.911	-81.1574		-59.0651				540	-272.423	-107.021	-420.103	-248.057	-444.657	-42.6602	-523.209	-75.3097	-158.188	-90.7519	-181.653	-90.0208	-710.792				540	-445.242	-40.7424	-710.546	-519.433	-470.317	-966.466	-204.851	-53.144	-37.1434	-39.522
	560	-40.6667	-23.0042	-35.8971	-228.46	-30.0599	-170.422	-70.538		-70.0514				560	-271.098	-118.552	-411.482	-253.668	-450.676	-40.1654	-470.504	-69.8842	-158.626	-87.4031	-189.04	-77.9855	-702.071				560	-444.832	-47.4616	-698.724	-505.109	-464.768	-968.348	-197.91	-49.9439	-40.6589	-37.836
	580	-30.1103	-28.6188		-205.747	-24.3216	-168.823	-60.1971		-58.1979				580	-267.866	-113.902	-405.782	-252.302	-421.721	-38.1429	-471.254	-67.0497	-157.945	-90.3704	-180.525	-79.1537	-697.732				580	-419.541	-49.1309	-700.211	-495.998	-466.204	-945.428	-204.005	-52.3589	-36.4253	-35.59
	600	-31.0972	-24.5359		-218.026	-30.206	-169.453	-62.928		-59.1225				600	-269.902	-82.9659	-404.804	-249.64	-442.75	-39.275	-493.061	-68.2634	-160.37	-87.4884	-179.889	-77.9431	-708.789				600	-397.963	-44.6467	-697.883	-503.419	-446.016	-934.871	-207.35	-50.9263	-41.9063	-35.8175
	620	-28.8319	-25.1555		-212.49	-32.8776	-169.769	-64.6343		-65.8515				620	-261.981	-90.4457	-410.14	-254.308	-460.683	-38.709	-466.656	-67.653	-152.606	-91.2711	-189.708	-77.1872	-697.841				620	-395.236	-41.081	-687.146	-492.105	-459.951	-949.559	-201.007	-50.2896	-41.4961	-37.9199
	640	-28.4995	-28.4044		-216.722	-29.0175	-167.719	-53.8526		-70.7222				640	-275.976	-73.8884	-400.175	-254.562	-441.497	-38.3091	-439.245	-72.2003	-146.959	-93.5381	-176.896	-72.4883	-694.422				640	-384.804	-41.9123	-740.762	-502.971	-464.376	-944.895	-211.843	-47.6354	-39.1257	-37.3188
	660	-23.4255	-23.467		-205.016	-28.2019	-161.9	-44.1136		-62.6698				660	-273.084	-94.6344	-393.337	-250.332	-398.961	-37.6303	-437.24	-69.8287	-152.108	-88.8068	-168.711	-74.0082	-690.076				660	-469.335	-42.6742	-723.142	-486.536	-466.757	-932.959	-212.48	-49.7092	-39.0117	-39.6673
	680	-20.3148	-26.3518		-199.797	-28.4168	-165.12	-50.3576		-54.0131				680	-263.873	-67.5755	-394.284	-229.592	-414.413	-39.5802	-365.487	-70.1581	-157.815	-91.3951	-174.711	-67.4014	-672.166				680	-525.547	-38.5795	-736.649	-481.04	-475.487	-936.39	-174.8	-54.6856	-38.438	-36.3526
	700	-15.9844	-28.3481		-194.574	-29.4657	-166.317	-49.6843		-62.413				700	-265.931	-77.4548	-397.885	-241.131	-399.206	-36.4438	-389.045	-71.4445	-150.96	-97.0142	-177.077	-79.6832	-675.578				700	-552.484	-30.0748	-734.579	-472.296	-466.285	-914.7	-186.044	-49.633	-36.7507	-37.0399
	720	-40.737	-24.183			-31.3844	-159.628	-43.5929		-59.47				720	-270.083	-66.3907	-391.844	-234.333	-368.271	-36.3894	-379.863	-69.9621	-153.496	-90.1333	-168.282	-70.0247	-676.401				720	-536.503	-34.9271	-730.932	-469.041	-469.543	-908.737	-188.447	-48.8184	-36.2831	-36.5165
	Interval between pulses	2020_01_31_0035	2020_01_31_0037-43	2020_01_31_0050	2020_01_31_0054	2020_02_06_0038-41	2020_02_06_0064-70	2020_03_13_0022-23	2020_03_13_0027	2020_03_13_0041-42				Interval between pulses	2020_02_13_0038-44	2020_02_20_0037	2020_02_20_0046-52	2020_03_03_0006-8	2020_03_03_0011-14	2020_03_03_0044-46	2020_03_05_0012	2020_03_12_15-18	2020_03_12_54-61	2020_03_12_68-72	2020_03_13_0002-05	2020_03_13_0019	2020_03_13_0053-55				Interval between pulses	2020_01_31_0008	2020_02_06_0015	2020_02_06_0019-21	2020_02_13_0018-20	2020_02_13_0010-15	2020_02_20_0013-15	2020_02_20_0038-40	2020_03_03_0035-42	2020_03_03_54-59	2020_03_03_62-73
	(ms)	Second Pulse	Second Pulse	Second Pulse	Second Pulse	Second Pulse	Second Pulse	Second Pulse	Second Pulse	Second Pulse				(ms)	Second Pulse	Second Pulse	Second Pulse	Second Pulse	Second Pulse	Second Pulse	Second Pulse	Second Pulse	Second Pulse	Second Pulse	Second Pulse	Second Pulse	Second Pulse				(ms)	Second Pulse	Second Pulse	Second Pulse	Second Pulse	Second Pulse	Second Pulse	Second Pulse	Second Pulse	Second Pulse	Second Pulse
	20	-8.47295	-3.70007	-9.45338	-99.4449	-3.93244	-8.06752	-12.7544	-27.496	-12.8416				20	-6.83594	-19.8963	-65.0204	-28.6684	-35.5811	-2.05163	-114.049	-11.1389	-16.2408	-14.6646	-36.5938	-16.9908	-126.393				20	-649.094	-368.611	-263.102	-225.218	-74.3405	-94.2238	-20.0917	-8.07561	-5.04671	-13.3908
	40	-20.5316	-8.32922	-15.0644	-200.206	-12.3092	-41.1145	-38.6944	-37.594	-28.7258				40	-52.3492	-63.58	-220.273	-125.451	-118.456	-11.2663	-357.882	-34.0049	-64.1856	-29.5096	-98.5561	-43.2258	-425.284				40	-911.623	-450.598	-465.298	-379.327	-246.475	-428.896	-110.641	-26.316	-14.0617	-19.3084
	60	-20.752	-12.848	-17.878	-273.927	-18.6451	-67.9249	-65.6358	-47.6195	-38.2678				60	-96.6547	-86.86	-316.149	-154.31	-192.534	-19.5605	-484.389	-54.0666	-91.7119	-50.2641	-133.798	-52.3791	-570.445				60	-963.893	-487.61	-565.37	-456.955	-320.558	-630.706	-138.023	-29.2008	-20.4159	-22.8099
	80	-25.7618	-16.1976	-17.851	-290.138	-21.4652	-89.7891	-85.9833	-37.8841	-41.1564				80	-133.947	-114.632	-356.555	-185.224	-258.596	-23.1974	-551.17	-62.8672	-116.115	-56.2898	-151.413	-52.0133	-629.324				80	-968.367	-498.949	-624.44	-510.467	-374.387	-749.073	-175.336	-37.886	-24.6358	-29.0372
	100	-35.7617	-25.2131	-25.3701	-229.138	-23.3986	-99.4548	-93.339	-46.0725	-51.6442				100	-159.974	-117.511	-397.69	-218.373	-328.554	-24.4292	-588.341	-65.154	-122.929	-66.3449	-168.733	-68.3574	-673.11				100	-930.982	-500.445	-650.815	-529.435	-406.972	-832.419	-202.834	-39.4066	-29.6777	-29.9837
	120	-28.78	-23.0397	-29.8531	-223.787	-35.4286	-116.863	-104.283	-44.2263	-59.7057				120	-182.209	-149.602	-420.196	-224.507	-348.29	-30.712	-617.134	-65.0317	-135.681	-69.0683	-169.884	-75.0045	-701.752				120	-901.138	-501.735	-694.874	-556.879	-407.426	-887.119	-221.232	-43.2442	-29.0445	-33.3472
	140	-35.705	-25.9398	-33.7655	-220.546	-30.6745	-124.288	-110.557	-56.6721	-61.3887				140	-199.525	-138.31	-427.173	-241.361	-392.416	-36.3743	-631.966	-69.4952	-138.908	-78.6798	-165.317	-85.4715	-724.254				140	-883.227	-482.985	-715.456	-577.748	-430.521	-914.716	-216.846	-45.8376	-33.6311	-33.7661
	160	-45.63	-20.5998	-28.0342	-224.515	-32.5519	-133.23	-104.752	-55.5027	-50.5444				160	-210.223	-147.394	-423.695	-238.596	-406.578	-33.1624	-632.047	-74.1547	-139.302	-78.6879	-193.105	-82.8906	-723.151				160	-863.83	-472.787	-734.137	-586.464	-428.721	-929.321	-222.609	-44.8454	-34.7385	-35.2472
	180	-38.757	-23.8455	-35.9524	-234.95	-31.974	-131.322	-100.498	-54.4633	-53.6989				180	-206.678	-168.379	-436.783	-239.348	-388.621	-35.5575	-661.017	-78.6707	-151.064	-74.8691	-181.446	-79.952	-736.702				180	-830.159	-456.506	-744.274	-592.128	-435.324	-955.37	-211.92	-45.1632	-37.9065	-31.4747
	200	-41.299	-25.8627	-36.1486	-223.615	-31.3213	-143.639	-111.165	-62.3918	-55.7988				200	-216.942	-165.405	-437.826	-249.425	-441.461	-35.3128	-660.772	-72.6409	-144.117	-81.8725	-176.938	-92.4157	-753.16				200	-799.588	-449.642	-744.575	-585.839	-440.644	-951.515	-214.774	-45.9563	-38.921	-34.8286
	220	-45.2152	-26.843	-39.4099	-228.911	-31.2844	-145.551	-121.714	-71.5411	-54.3243				220	-220.379	-149.56	-439.604	-240.53	-406.996	-35.8717	-660.718	-75.0763	-152.495	-77.4788	-175.038	-89.6772	-735.571				220	-747.175	-431.327	-750.761	-582.029	-437.846	-952.751	-219.372	-42.0709	-36.6308	-36.1059
	240	-50.0883	-27.2559	-35.6485	-247.209	-32.7344	-149.21	-112.098	-60.6514	-57.784				240	-235.165	-162.814	-431.08	-239.412	-451.383	-42.5776	-671.605	-69.4214	-154.988	-83.9213	-194.924	-88.6303	-747.052				240	-730.315	-112.506	-754.275	-600.302	-445.896	-963.789	-219.766	-40.9592	-42.8834	-35.3882
	260	-46.735	-25.7755	-32.8536	-231.499	-30.7126	-155.368	-115.777	-57.6601	-71.4776				260	-240.003	-170.091	-429.317	-247.041	-463.502	-37.4077	-645.216	-74.1426	-154.264	-85.3482	-219.599	-79.4953	-753.93				260	-708.746	-48.9967	-767.241	-584.037	-452.45	-969.682	-220.556	-46.6927	-37.9921	-36.7978
	280	-44.6293	-29.2261	-40.192	-243.855	-31.2234	-161.832	-115	-56.4122	-64.5311				280	-238.884	-161.791	-458.664	-252.625	-426.282	-44.4328	-663.592	-66.8325	-164.396	-86.1727	-221.435	-84.7156	-741.756				280	-683.916	-36.8856	-756.077	-588.926	-450.029	-968.273	-221.394	-46.1938	-39.393	-37.6201
	300	-47.9	-24.2534	-43.2893	-232.992	-29.8019	-166.255	-115.727	-39.6517	-62.0867				300	-239.202	-161.043	-462.153	-252.057	-440.842	-39.1169	-623.407	-79.3396	-156.856	-87.7017	-215.561	-83.4868	-740.751				300	-667.199	-44.438	-742.6	-575.377	-446.77	-991.566	-218.697	-47.96	-40.0274	-35.3862
	320	-47.2764	-23.981	-35.7278	-229.349	-29.0263	-165.708	-112.158	-36.8054	-59.328				320	-245.429	-162.605	-461.964	-246.316	-421.171	-41.1151	-627.482	-72.7359	-157.863	-84.7939	-217.161	-77.2337	-743.65				320	-644.508	-44.8279	-751.098	-587.244	-461.812	-958.294	-216.675	-44.8754	-41.5037	-36.0471
	340	-54.5317	-24.5009	-38.8854	-239.362	-28.0264	-167.33	-105.379	-25.6257	-55.2942				340	-255.689	-161.241	-459.693	-248.419	-483.932	-37.2637	-636.888	-73.7626	-162.187	-89.1735	-216.415	-84.467	-734.676				340	-620.092	-42.0169	-750.434	-585.73	-449.633	-966.413	-214.489	-45.8801	-37.089	-36.7033
	360	-49.6755	-27.2722	-30.8281	-247.074	-24.8808	-166.607	-110.147	-18.8031	-60.5819				360	-250.615	-166.339	-458.39	-246.513	-434.799	-35.2463	-617.179	-78.0644	-168.778	-86.437	-208.707	-84.754	-743.024				360	-600.118	-43.9409	-730.218	-588.007	-468.039	-970.996	-212.259	-48.2247	-41.4006	-36.1371
	380	-48.218	-25.6886	-35.8561	-212.665	-32.7781	-171.487	-105.321	-14.2315	-57.3519				380	-249.156	-149.758	-446.855	-248.643	-435.53	-36.8175	-614.879	-70.5087	-170.743	-86.774	-209.502	-63.2219	-747.394				380	-571.12	-46.3019	-739.98	-576.193	-463.377	-981.725	-211.269	-55.5011	-41.3466	-37.0049
	400	-52.795	-27.7629	-31.2536	-220.114	-30.2013	-174.984	-100.747	-16.9841	-59.3642				400	-256.682	-151.69	-461.641	-250.129	-459.498	-43.0681	-603.256	-81.4173	-154.872	-83.9067	-215.678	-92.0681	-739.727				400	-552.936	-42.4538	-731.192	-567.575	-457.808	-965.767	-211.746	-41.3531	-37.7805	-37.6918
	420	-52.8534	-25.264	-35.3789	-228.148	-26.4745	-171.272	-88.9394	-16.0323	-52.9344				420	-258.886	-150.583	-442.933	-254.888	-468.662	-38.3675	-586.778	-73.7757	-162.806	-93.1433	-208.141	-85.5321	-731.444				420	-544.982	-41.4671	-721.971	-567.578	-464.326	-963.344	-217.357	-49.3785	-43.7576	-36.728
	440	-49.0625	-35.3013	-34.9062	-232.974	-30.8642	-172.85	-93.362		-68.0089				440	-251.655	-135.45	-439.12	-254.308	-471.019	-33.5074	-589.664	-66.1595	-143.247	-85.8534	-203.914	-79.281	-741.74				440	-501.136	-43.6479	-730.814	-560.637	-437.32	-972.279	-205.792	-49.3351	-41.0139	-37.4626
	460	-55.4456	-29.3536	-40.1968	-219.074	-27.9432	-169.365	-94.4398		-71.6619				460	-262.71	-132.297	-436.054	-241.494	-462.474	-41.8796	-558.395	-68.4816	-162.324	-82.2494	-208.49	-104.96	-733.996				460	-509.484	-48.1437	-712.844	-549.141	-449.816	-976.301	-197.307	-51.2306	-40.0554	-38.0557
	480	-45.7056	-31.6697	-34.0497	-222.454	-29.2125	-167.993	-89.9627		-67.5285				480	-260.671	-105.98	-371.12	-253.489	-406.036	-38.4642	-551.172	-71.7709	-149.456	-87.0681	-198.101	-82.254	-736.903				480	-483.768	-36.8585	-722.934	-519.672	-465.954	-981.912	-195.678	-55.1209	-37.6546	-38.6925
	500	-51.9362	-28.5701	-35.961	-219.535	-29.6133	-166.753	-83.2282		-68.5044				500	-271.763	-102.132	-417.455	-235.402	-465.742	-43.7781	-561.877	-68.6696	-155.689	-84.0123	-198.384	-108.453	-711.083				500	-465.731	-48.7351	-711.925	-526.45	-447.21	-960.011	-198.063	-47.5515	-39.3905	-36.3497
	520	-48.9855	-27.4901	-35.2335	-193.63	-26.9421	-170.507	-70.3769		-49.931				520	-261.192	-98.9787	-416.05	-241.905	-388.934	-40.816	-521.095	-69.1688	-151.437	-87.2181	-198.874	-97.6219	-709.108				520	-465.496	-33.9128	-697.99	-521.066	-469.181	-955.301	-202.657	-49.9418	-39.8295	-37.0011
	540	-43.1304	-21.858	-33.192	-226.797	-30.0162	-167.175	-67.5771		-56.6237				540	-268.761	-96.9501	-416.822	-248.667	-471.513	-37.6756	-481.094	-71.9528	-154.627	-86.098	-180.534	-81.781	-703.875				540	-456.229	-51.1184	-702.611	-509.363	-463.603	-951.309	-188.88	-45.6163	-41.4159	-39.0226
	560	-21.1354	-27.5818	-36.2022	-234.564	-32.1351	-164.786	-63.519		-66.9997				560	-260.905	-99.0206	-409.803	-257.94	-426.567	-39.1481	-472.946	-64.3911	-162.898	-83.7409	-180.597	-77.9855	-706.547				560	-432.014	-43.1892	-702.997	-499.006	-460.42	-957.463	-218.255	-45.5697	-42.9172	-37.2812
	580	-28.5845	-27.5507		-207.82	-33.2327	-166.341	-58.3661		-52.0944				580	-258.772	-103.221	-409.749	-249.555	-482.756	-38.2447	-452.333	-66.2868	-139.329	-84.4195	-182.661	-91.3607	-707.904				580	-412.216	-41.9287	-702.449	-502.814	-461.702	-936.374	-199.936	-51.8503	-44.7872	-37.9759
	600	-32.043	-23.3152		-204.598	-30.2263	-161.61	-61.4021		-59.1225				600	-270.208	-87.5436	-396.64	-252.997	-415.589	-35.9181	-450.947	-73.7565	-151.419	-93.0579	-175.413	-70.9241	-696.785				600	-387.892	-44.8298	-706.489	-514.609	-459.749	-944.23	-197.076	-50.9263	-42.2115	-39.3964
	620	-25.94	-25.7659		-201.198	-32.2062	-172.068	-50.1384		-56.391				620	-270.343	-87.6991	-404.876	-251.256	-421.926	-38.4038	-501.751	-63.9909	-163.287	-91.678	-174.042	-82.0701	-692.653				620	-389.133	-46.0859	-685.131	-503.294	-459.417	-943.964	-209.552	-56.1896	-40.5806	-34.9237
	640	-31.5512	-26.4207		-202.074	-31.5606	-169.876	-57.9725		-52.4117				640	-275.732	-82.703	-402.235	-246.017	-390.533	-42.1747	-455.114	-70.3693	-158.047	-84.0776	-179.744	-64.5538	-700.322				640	-458.351	-40.5695	-740.121	-494.223	-457.738	-931.976	-229.238	-53.9424	-45.9006	-38.0401
	660	-20.68	-22.3989		-196.776	-25.1298	-167.139	-50.8275		-51.0731				660	-265.089	-88.5309	-404.4	-262.539	-416.051	-37.0199	-404.281	-74.4063	-162.891	-90.231	-172.678	-76.7547	-678.988				660	-501.683	-31.1996	-742.002	-486.129	-466.528	-914.953	-210.344	-48.7937	-37.7299	-39.2234
	680	-42.29	-24.9785		-204.985	-30.5123	-166.921	-49.1369		-55.8441				680	-267.596	-63.303	-393.521	-245.461	-429.061	-41.7164	-396.615	-71.5314	-153.339	-90.0727	-177.865	-82.355	-686.001				680	-535.923	-33.0253	-748.947	-494.874	-458.092	-927.031	-167.323	-47.5649	-37.8887	-34.8822
	700	-44.0606	-27.1274		-196.405	-30.9305	-167.426	-46.1748		-57.225				700	-261.17	-79.591	-396.359	-254.864	-361.669	-40.6146	-339.606	-71.9022	-150.859	-88.9779	-182.265	-78.1573	-675.069				700	-557.062	-27.9386	-735.8	-479.315	-465.064	-917.854	-185.738	-49.9382	-36.6897	-35.1811
	720	-41.3474	-29.6761			-29.4923	-164.511	-42.2196		-64.658				720	-275.942	-64.5596	-394.209	-231.891	-421.677	-39.7464	-360.637	-71.9457	-162.957	-89.3195	-184.456	-70.3299	-679.86				720	-529.789	-39.734	-725.194	-467.719	-457.26	-934.372	-189.261	-49.5305	-33.7806	-38.3171
																																Cell Lifted
	Interval between pulses	2020_01_31_0035	2020_01_31_0037-43	2020_01_31_0050	2020_01_31_0054	2020_02_06_0038-41	2020_02_06_0064-70	2020_03_13_0022-23	2020_03_13_0027	2020_03_13_0041-42				Interval between pulses	2020_02_13_0038-44	2020_02_20_0037	2020_02_20_0046-52	2020_03_03_0006-8	2020_03_03_0011-14	2020_03_03_0044-46	2020_03_05_0012	2020_03_12_15-18	2020_03_12_54-61	2020_03_12_68-72	2020_03_13_0002-05	2020_03_13_0019	2020_03_13_0053-55				Interval between pulses	2020_01_31_0008	2020_02_06_0015	2020_02_06_0019-21	2020_02_13_0018-20	2020_02_13_0010-15	2020_02_20_0013-15	2020_02_20_0038-40	2020_03_03_0035-42	2020_03_03_54-59	2020_03_03_62-73
	(ms)	Current Recovery (%)	Current Recovery (%)	Current Recovery (%)	Current Recovery (%)	Current Recovery (%)	Current Recovery (%)	Current Recovery (%)	Current Recovery (%)	Current Recovery (%)	Average	SEM		(ms)	Current Recovery (%)	Current Recovery (%)	Current Recovery (%)	Current Recovery (%)	Current Recovery (%)	Current Recovery (%)	Current Recovery (%)	Current Recovery (%)	Current Recovery (%)	Current Recovery (%)	Current Recovery (%)	Current Recovery (%)	Current Recovery (%)	Average	SEM		(ms)	Current Recovery (%)	Current Recovery (%)	Current Recovery (%)	Current Recovery (%)	Current Recovery (%)	Current Recovery (%)	Current Recovery (%)	Current Recovery (%)	Current Recovery (%)	Current Recovery (%)	Average	SEM
	20	16.0706	10.7178	22.2892	22.0197	9.14629	4.28777	9.13934	22.8621	16.8264	14.8177	2.26724		20	2.5974	8.20909	14.744	10.2899	11.1936	4.88138	18.7729	12.2483	9.92465	15.5736	13.884	14.6254	16.0208	11.7666	1.27468		20	56.4783	57.0537	34.8121	33.9777	15.9465	9.2977	8.03045	15.0528	13.6515	34.3863	27.8687	5.81687
	40	36.117	28.945	32.8293	46.5923	33.3526	22.0609	28.158	37.0837	33.3638	33.1669	2.26914		40	19.6281	25.678	48.2952	43.7281	46.0361	26.0745	55.6919	37.7813	38.6158	31.84	38.38	38.527	53.1849	38.7278	3.00688		40	81.2578	73.4909	59.9259	57.4041	51.5115	42.1403	34.8421	50.6556	37.7445	49.3256	53.8298	4.69095
	60	35.4494	37.7242	46.6486	65.5375	46.9143	36.5473	48.2691	50.9867	52.5998	46.7419	3.16392		60	37.7261	40.8584	68.3031	55.0423	49.1775	39.8699	71.651	61.2678	54.8877	51.8014	56.4491	43.6027	71.924	54.0432	3.27331		60	88.3616	81.2633	72.5297	69.0867	67.37	62.0749	51.3011	57.8676	54.4341	62.467	66.6756	3.69134
	80	46.7897	52.7721	40.2039	75.8319	53.6909	49.4943	65.6376	43.5362	57.4217	53.9309	3.72202		80	50.7116	59.8485	77.549	66.555	66.1816	55.0768	81.7942	77.0096	68.9929	59.6701	63.2725	47.1554	78.3547	65.5517	3.05599		80	91.283	85.7364	79.1687	76.2385	79.6338	74.2855	69.8494	68.0327	60.0971	74.566	75.8891	2.8102
	100	60.0377	75.7143	53.5882	82.3432	57.1305	54.2588	68.5228	67.1068	63.0911	64.6437	3.26405		100	61.0245	56.2084	85.3601	76.3216	72.4691	54.5609	86.5732	77.2149	67.7209	69.6459	72.8796	68.0844	85.2705	71.7949	2.91596		100	94.0209	89.3628	82.5308	81.162	87.1003	82.0271	75.188	78.996	75.2414	77.9903	82.362	1.94817
	120	53.7919	68.9487	66.6264	75.8091	95.3982	64.9556	78.3364	77.9476	80.2991	73.5681	3.91507		120	76.0773	77.7852	89.2701	79.9928	75.4176	62.779	91.4941	75.8089	78.2379	78.7011	80.9503	69.4718	89.5851	78.8901	2.21571		120	95.2271	93.2929	87.355	86.3686	88.1049	87.0091	85.2594	92.9995	69.2808	89.7016	87.4599	2.27843
	140	69.6426	93.4067	80.9724	80.5951	73.9904	67.0103	86.0969	76.2007	81.0606	78.7751	2.71925		140	76.4323	70.6803	91.4422	86.9215	83.505	92.9792	94.9124	78.4647	85.2636	83.2832	82.7404	80.4642	93.3768	84.6512	2.00609		140	95.8916	93.5012	88.2769	89.4338	93.6597	88.8894	86.0005	87.2243	81.7511	90.6188	89.5247	1.3113
	160	87.6787	59.4719	61.7096	84.205	82.1354	73.221	79.5946	78.7761	64.5395	74.5924	3.4573		160	79.8899	68.9008	91.7402	86.5017	85.9933	84.2376	91.6781	86.7853	80.6286	86.7158	88.363	77.69	92.8188	84.7649	1.84243		160	95.609	91.6039	91.2365	90.5452	90.8348	91.332	92.1662	89.2678	82.4678	87.0501	90.2113	1.09822
	180	69.7181	74.3193	90.0618	91.994	76.7532	71.7132	75.4761	86.8592	76.1865	79.2313	2.73616		180	84.7781	88.1741	94.022	91.8059	80.473	75.6517	94.5852	93.4733	87.3531	81.7549	84.1091	75.2865	94.2969	86.5972	1.918		180	97.9124	94.468	91.1543	92.1189	95.0682	96.1604	88.7151	99.3288	88.2113	89.2254	93.2363	1.24619
	200	75.8873	76.5232	88.7601	85.8269	86.3674	75.666	90.7788	114.57	79.8987	86.0309	4.05339		200	84.5399	86.8587	94.2983	90.4796	89.0434	75.7715	97.964	81.0922	88.8936	88.5324	89.7338	90.1731	97.588	88.8437	1.69502		200	98.9801	97.1386	91.5521	91.2101	94.9216	96.6222	90.9924	101.803	106.337	94.5045	96.4061	1.56574
	220	68.2264	93.6144	97.7297	95.1781	89.9396	79.8437	99.1302	119.346	94.6811	93.0765	4.65196		220	85.8525	79.4193	96.1936	91.2055	80.2605	76.5539	94.7485	94.7979	91.6822	79.8668	90.6731	98.6571	95.7875	88.8999	2.10138		220	96.9126	96.412	93.8145	91.7865	96.0018	94.6156	99.401	88.6407	82.0833	97.6735	93.7341	1.6204
	240	78.4822	85.6199	74.0199	95.2944	96.7529	80.2493	90.6253	92.9821	85.9313	86.6619	2.6391		240	91.618	100.565	95.7466	94.0083	95.358	90.0982	100.137	96.6027	95.6675	84.3555	88.1742	94.1638	96.8098	94.1003	1.26809		240	98.0739	58.3637	94.5042	95.5784	97.6117	97.1294	98.2713	85.1897	103.69	92.194	92.0606	4.03805
	260	91.6238	83.2448	77.6424	84.1386	84.1658	82.4995	98.4431	88.7293	99.5748	87.7847	2.48898		260	94.1347	91.1674	96.0733	95.5161	91.505	83.2477	94.8412	97.1995	90.2947	90.0216	97.736	92.8696	99.49	93.3921	1.1809		260	98.0992	89.5178	96.2483	93.9918	97.6455	95.5493	95.2969	93.8651	104.359	98.5875	96.316	1.22044
	280	83.4514	93.644	101.542	97.2022	84.1531	87.6288	91.1693	100	98.1435	92.9927	2.26121		280	89.853	87.7515	99.454	97.6408	85.4942	103.067	97.5769	83.2698	95.9624	95.5987	91.0109	103.351	96.968	94.3845	1.77484		280	98.9841	78.0456	94.4518	95.8606	98.3004	96.4531	100.415	86.3145	102.38	97.7651	94.897	2.31931
	300	90.7493	79.4946	109.241	92.0429	86.175	91.5985	100.53	81.753	89.8431	91.2697	3.04348		300	92.2772	100	99.8846	97.7514	93.8293	86.3087	91.9847	96.834	96.1941	101.144	91.9307	89.8217	97.1969	95.0121	1.22328		300	99.9085	96.2968	94.7265	96.0272	97.0661	99.1259	93.8042	104.199	90.3555	96.7386	96.8249	1.18108
	320	83.7763	75.4998	100.862	98.4284	89.4088	92.5309	105.755	105.235	87.4104	93.2118	3.4135		320	95.2619	100.567	99.6708	92.8664	82.0462	97.1166	97.3486	93.5254	90.8658	93.9953	94.5943	93.0167	98.1736	94.5422	1.30811		320	99.1549	94.9577	97.1475	99.4146	97.7078	96.4473	92.168	102.557	94.5759	92.92	96.7051	1.0075
	340	85.6245	76.2548	111.362	104.951	91.6809	93.1008	94.7849	67.1922	79.7524	89.4114	4.63283		340	98.6576	111.384	100.383	93.5633	124.69	89.714	98.3506	88.4702	101.27	102.007	95.5104	107.789	96.2293	100.617	2.6792		340	98.3542	86.9852	97.7708	97.7257	97.728	97.8273	99.858	98.2572	90.7418	92.6467	95.7895	1.32362
	360	89.0576	86.876	85.5953	105.885	74.3005	91.8876	106.022	79.3852	76.4946	88.3893	3.83849		360	97.7617	91.752	99.6351	97.8203	89.0607	98.5775	94.5754	94.6357	102.851	90.6396	92.724	98.2315	98.5163	95.9062	1.11507		360	98.2021	100.699	96.2046	101.51	99.481	98.8505	99.381	91.684	109.704	95.7371	99.1454	1.47787
	380	98.723	85.3056	92.885	90.7537	105.431	95.888	104.862	66.9702	78.3271	91.0162	4.18001		380	92.9635	89.1056	98.7023	96.3348	108.599	98.3694	95.0021	94.2867	101.328	96.7669	95.281	95.3952	98.6704	96.985	1.28308		380	98.9425	90.4603	98.5825	97.504	97.7469	97.8701	93.5158	105.819	110.614	98.9613	99.0016	1.79393
	400	106.465	94.7902	81.0145	93.8821	95.3128	99.3877	97.0597	91.7563	97.494	95.2402	2.26123		400	97.5187	96.3178	99.2292	96.5827	94.8949	110.146	95.5529	96.5616	95.1261	95.7346	96.6273	113.55	97.4797	98.8709	1.63944		400	97.054	90.9751	98.8367	99.4829	99.7838	99.1956	95.2412	91.4513	98.2539	95.1001	96.5375	1.02921
	420	112.323	72.4372	99.1447	90.8826	79.1396	98.9074	92.9811		82.8126	91.0785	4.51127		420	98.0807	102.28	97.7277	101.829	100.392	96.4209	97.8622	89.9534	95.2394	95.0189	95.7864	84.3504	98.0902	96.387	1.3396		420	99.4433	89.4653	96.9167	99.6784	96.988	98.1042	105.376	107.058	102.429	101.612	99.707	1.56315
	440	108.066	116.052	102.694	96.8292	100.998	98.5046	99.3506		114.96	104.682	2.64622		440	96.8295	111.283	97.4272	95.5291	100.39	97.7739	101.364	85.5897	83.6616	95.6644	98.4288	90.9023	98.8344	96.4367	1.93792		440	96.6453	90.5079	101.389	98.6928	95.917	99.6871	103.637	104.978	90.688	96.6365	97.8778	1.53754
	460	117.455	95.0585	99.2465	100.985	85.9238	95.5682	104.916		110.858	101.251	3.47939		460	100.373	111.012	99.2186	94.6193	101.609	115.097	94.524	85.5183	99.6874	92.1371	105.726	105.2	99.6273	100.334	2.18032		460	99.4045	107.349	98.7904	96.3414	99.6451	99.7713	95.4714	93.6757	94.7998	99.9273	98.5176	1.22459
	480	89.8062	106.682	100.904	94.675	102.792	98.7207	98.6613		122.066	101.788	3.40765		480	100.117	86.3282	99.8905	101.095	86.033	90.8679	99.7791	104.907	94.1076	101.875	95.3486	88.5069	99.4645	96.0246	1.74962		480	97.419	76.5495	100.014	97.8547	101.31	101.525	92.9009	109.719	96.5569	105.205	97.9055	2.79915
	500	101.189	90.3494	126.929	91.7133	98.4442	97.8098	85.4333		114.251	100.765	4.82961		500	103.463	97.3808	102.626	96.8605	99.9343	114.653	94.6047	93.5556	96.3488	91.5223	101.351	98.8876	97.151	99.1029	1.61497		500	96.4604	103.904	98.8307	101.311	94.1987	99.2219	96.1009	87.3004	99.0789	98.9428	97.535	1.42518
	520	98.7695	107.777	97.4672	88.9276	91.1234	101.189	78.9464		78.4291	92.8287	3.70415		520	100.047	88.2942	100.535	99.2488	85.108	126.081	95.6852	88.8302	96.7506	98.7902	98.8872	77.8528	100.273	96.6448	3.14271		520	96.1548	82.852	97.6935	101.466	102.86	102.791	94.6774	101.446	107.054	93.4815	98.0477	2.15212
	540	82.4899	78.6005	77.8198	105.389	100.34	98.3897	83.2667		95.8666	90.2703	3.84522		540	98.6558	90.5898	99.219	100.246	106.04	88.3156	91.9506	95.5425	97.7489	94.8718	99.384	90.8468	99.0269	96.3413	1.36615		540	102.468	125.467	98.8833	98.0613	98.5725	98.4317	92.2036	85.8353	111.503	98.7364	101.016	3.41432
	560	51.9723	119.899	100.85	102.672	106.904	96.6929	90.0493		95.6436	95.5853	6.98361		560	96.2401	83.525	99.592	101.684	94.6505	97.4672	100.519	92.1397	102.693	95.81	95.5337	100	100.638	96.9609	1.41137		560	97.1185	90.9982	100.612	98.7917	99.0645	98.8759	110.28	91.2418	105.554	98.5337	99.107	1.82792
	580	94.9326	96.2678		101.008	136.639	98.5298	96.9583		89.5125	101.978	5.93019		580	96.605	90.6226	100.978	98.9112	114.473	100.267	95.985	98.8622	88.2136	93.415	101.183	115.422	101.458	99.7227	2.19439		580	98.254	85.3408	100.32	101.374	99.0343	99.0423	98.0054	99.0286	122.956	106.704	101.006	2.95995
	600	103.041	95.0248		93.8411	100.067	95.3716	97.5752		100	97.8459	1.26077		600	100.113	105.518	97.9832	101.345	93.8654	91.4528	91.4587	108.047	94.4185	106.366	97.5118	90.9947	98.3064	98.26	1.61563		600	97.4694	100.41	101.233	102.223	103.079	101.001	95.0451	100	100.728	109.992	101.118	1.22899
	620	89.9698	102.427		94.6859	97.9579	101.354	77.5724		85.6336	92.8	3.40605		620	103.192	96.9633	98.7165	98.7999	91.5871	99.2116	107.521	94.5869	106.999	100.446	91.742	106.326	99.2566	99.6421	1.46769		620	98.4559	112.183	99.7068	102.274	99.8839	99.4108	104.251	111.732	97.7938	92.0986	101.779	1.9658
	640	110.708	93.0162		93.2411	108.764	101.286	107.65		74.1093	98.3964	4.87568		640	99.9116	111.93	100.515	96.6433	88.4565	110.091	103.613	97.464	107.545	89.8859	101.61	89.0541	100.85	99.8129	2.10357		640	119.113	96.7962	99.9135	98.2607	98.5706	98.6328	108.211	113.24	117.316	101.933	105.199	2.70503
	660	88.2799	95.4485		95.9808	89.1068	103.236	115.22		81.4956	95.5381	4.19199		660	97.0723	93.5504	102.813	104.876	104.284	98.3779	92.462	106.555	107.089	101.604	102.351	103.711	98.3932	101.011	1.30104		660	106.892	73.1112	102.608	99.9163	99.9509	98.07	98.9947	98.1583	96.7143	98.8809	97.3297	2.84057
	680	na	94.7886		102.597	107.374	101.091	97.5759		103.39	101.136	1.81745		680	101.411	93.6774	99.8065	106.912	103.535	105.397	108.517	101.957	97.1638	98.5531	101.805	122.186	102.058	103.306	1.92074		680	101.974	85.6032	101.669	102.876	96.3416	99.0005	95.7225	86.9788	98.5709	95.9552	96.4693	1.88029
	700	na	95.6939		100.941	104.971	100.667	92.9364		91.6876	97.8162	2.12101		700	98.2097	102.758	99.6165	105.695	90.5971	111.444	87.2922	100.641	99.9331	91.7164	102.93	98.085	99.9247	99.1418	1.78309		700	100.829	92.897	100.166	101.486	99.7381	100.345	99.8355	100.615	99.834	94.9816	99.0727	0.885566
	720	101.498	122.715			93.9712	103.059	96.8497		108.724	104.469	4.20349		720	102.169	97.2419	100.604	98.9579	114.502	109.225	94.9387	102.835	106.164	99.0971	109.611	100.436	100.511	102.792	1.54658		720	98.7486	113.763	99.215	99.7181	97.3841	102.821	100.432	101.459	93.1028	104.931	101.157	1.7233
		2020_01_31_0035	2020_01_31_0037-43	2020_01_31_0050	2020_01_31_0054	2020_02_06_0038-41	2020_02_06_0064-70	2020_03_13_0022-23	2020_03_13_0027	2020_03_13_0041-42					2020_02_13_0038-44	2020_02_20_0037	2020_02_20_0046-52	2020_03_03_0006-8	2020_03_03_0011-14	2020_03_03_0044-46	2020_03_05_0012	2020_03_12_15-18	2020_03_12_54-61	2020_03_12_68-72	2020_03_13_0002-05	2020_03_13_0019	2020_03_13_0053-55					2020_01_31_0008	2020_02_06_0015	2020_02_06_0019-21	2020_02_13_0018-20	2020_02_13_0010-15	2020_02_20_0013-15	2020_02_20_0038-40	2020_03_03_0035-42	2020_03_03_54-59	2020_03_03_62-73
		Fit Rec Des	Fit Rec Des	Fit Rec Des	Fit Rec Des	Fit Rec Des	Fit Rec Des	Fit Rec Des	Fit Rec Des	Fit Rec Des					Fit Rec Des	Fit Rec Des	Fit Rec Des	Fit Rec Des	Fit Rec Des	Fit Rec Des	Fit Rec Des	Fit Rec Des	Fit Rec Des	Fit Rec Des	Fit Rec Des	Fit Rec Des	Fit Rec Des					Fit Rec Des	Fit Rec Des	Fit Rec Des	Fit Rec Des	Fit Rec Des	Fit Rec Des	Fit Rec Des	Fit Rec Des	Fit Rec Des	Fit Rec Des
	t	124.8	109.64	118.16	61.414	92.233	124.22	77.08	91.035	88.51	98.5658	7.35298		t	85.706	87.439	45.011	64.35	78.527	111.99	35.824	55.571	70.042	76.043	73.243	93.213	40.938	70.6075	6.12106		t	32.219	34.661	60.13	66.127	42.033	48.638	57.662	54.285	82.285	60.525	53.8565	4.78529

## Sheet: Figure 2C Statistics
	STATISTICAL ANALYSIS
	Ordinary one-way ANOVA with Newman-Keuls multiple comparisons post-hoc test
	Comparison	Mean Diff.	Significant?	Summary
	0 TARPs vs 4 TARPs	44.71	Yes	***
	2 TARPs vs 4 TARPs	16.75	No	ns
	0 TARPs vs 2 TARPs	27.96	Yes	**
	F Value = 11.82
	P Value = 0.0002
