# Supplementary material for: AMPAR/TARP stoichiometry differentially modulates channel properties
Source: eLife. 2020 May 26;9:e53946. doi: 10.7554/eLife.53946 (PMC7299370; doi:10.7554/eLife.53946)
Supplement: Figure 3—source data 1. [file elife-53946-fig3-data1.xlsx]

## Sheet: Figure 3C Rectification Index 
	0 TARPS (GluA1+GFP)					2 TARPs (GluA1 + GluA1:g2)					4 TARPs ( GluA1:g2)
	File	Normalized "+60mV"	Normalized "-60mV"	RI (+60mV/-60mV)		File	Normalized "+60mV"	Normalized "-60mV"	RI (+60mV/-60mV)		File	Normalized "+60mV"	Normalized "-60mV"	RI (+60mV/-60mV)
	14_05_21_0101_0110	0.0149412	-0.493843	0.0302551		14_05_09_0007_0014	0.115634	-0.652218	0.177293		14_05_23_0026_32	0.0555324	-0.46844	0.118548
	14_05_21_0125_0130	0.0321724	-0.414032	0.077705		16_05_10_0041-47	0.0412898	-0.492747	0.0837951		14_07_29_0001_14	0.151303	-0.677842	0.223213
	14_09_17_0014_0021	0.0276865	-0.476682	0.0580816		16_05_10_0017-21	0.0359895	-0.504179	0.0713823		14_07_29_0017_26	0.102639	-0.690514	0.148642
	14_09_17_0024_0026	0.0413087	-0.440677	0.0937392		16_05_10_00106-110	0.0662883	-0.614926	0.107799		14_07_29_0040_46	0.129584	-0.658957	0.19665
	14_09_17_0031_0035	0.0258657	-0.541371	0.0477781		16_05_20_00082-86	0.0862804	-0.508141	0.169796		14_07_29_0053_59	0.12221	-0.607946	0.201021
	14_09_22_0004_0006	0.018661	-0.393938	0.0473705		16_05_20_0096-99	0.0739314	-0.558374	0.132405		14_09_17_0046_48	0.233178	-0.614532	0.379441
	16_05_19_11-14	0.0207357	-0.470214	0.0440985		16_05_20_0096-99,103-105	0.062977	-0.541644	0.11627		14_09_17_0050_52	0.185881	-0.67257	0.276374
	16_05_19_07-12	0.0236077	-0.467047	0.0505468		16_05_25_0092-95	0.0543019	-0.496898	0.109282		14_09_18_0029_37	0.202733	-0.618271	0.327902
	16_05_19_43-47	0.0247319	-0.45121	0.0548124		16_05_25_00102-105	0.053208	-0.518127	0.102693		14_09_18_0054_60	0.0971823	-0.659758	0.1473
	16_05_19_56-60	0.018872	-0.390155	0.0483706		16_05_25_00113-117	0.0643856	-0.519374	0.123968		14_09_23_0007_17	0.284016	-0.741911	0.382817
	16_05_19_71-75	0.0274483	-0.465074	0.0590191		16_05_25_00120-124	0.0762006	-0.513456	0.148407		14_09_23_0020_23	0.181682	-0.664485	0.273418
	16_05_19_84-88	0.0331477	-0.469147	0.0706552		16_05_26_0033-37	0.114528	-0.609751	0.187827		14_09_23_0031_38	0.229069	-0.687014	0.333427
	16_05_19_98-104*	0.0236945	-0.401009	0.0590873		16_05_26_0049-53	0.0739763	-0.573011	0.129101		14_09_23_0041_42	0.28119	-0.699191	0.402165
	16_05_19_126-130	0.0215693	-0.441615	0.0488419				Mean	0.127694		16_05_10_0073-77	0.0870055	-0.593996	0.146475
			Mean	0.0564544				S.E.M.	0.0106252		16_05_10_0115-121	0.0644715	-0.551384	0.116927
			S.E.M.	0.00433351				N	13		16_05_10_0135-140	0.135523	-0.580982	0.233266
			N	14							16_05_10_0154-159	0.146429	-0.60314	0.242777
											16_05_05_0037-43	0.127303	-0.619887	0.205364
											16_05_05_0054-61	0.157672	-0.632484	0.249291
											16_05_20_0008-14	0.182701	-0.657369	0.277928
											16_05_20_00029-35	0.192276	-0.630127	0.305139
											16_05_20_00065-68	0.197617	-0.616542	0.320526
	STATISTICAL ANALYSIS										16_05_25_00082-86	0.0862804	-0.508141	0.169796
	Comparison	Test	p-value	Graphic							16_05_20_0012-16	0.0178385	-0.658466	0.027091
	0 TARPs vs 4 TARPs	Student's t-test	<0.0001	****							16_05_25_0018-22	0.241744	-0.628236	0.384799
	0 TARPs vs 2 TARPs	Student's t-test	<0.0001	****							16_05_25_0030-34	0.219974	-0.646013	0.340511
	2 TARPs vs 4 TARPs	Student's t-test	<0.0001	****							16_05_25_0043-47	0.376348	-0.677548	0.555455
											16_05_25_0062-66	0.196606	-0.693513	0.283492
	STATISTICAL ANALYSIS										16_05_25_0075-79	0.198924	-0.634984	0.313273
	Ordinary one-way ANOVA with Newman-Keuls multiple comparisons post-hoc test										16_05_26_0004-12, 18+19	0.311859	-0.753921	0.41365
	Comparison	Mean Diff.	Significant?	Summary							16_05_26_00021-25	0.339986	-0.667166	0.509598
	0 TARPs vs 4 TARPs	-0.2179	Yes	****									Mean	0.274396
	0 TARPs vs 2 TARPs	-0.07112	Yes	*									S.E.M.	0.0210495
	2 TARPs vs 4 TARPs	-0.1467	Yes	****									N	31
	F Value = 33.28
	P Value < 0.0001
