# Supplementary material for: AMPAR/TARP stoichiometry differentially modulates channel properties
Source: eLife. 2020 May 26;9:e53946. doi: 10.7554/eLife.53946 (PMC7299370; doi:10.7554/eLife.53946)
Supplement: Figure 4—figure supplement 1—source data 1. [file elife-53946-fig4-figsupp1-data1.xlsx]

## Sheet: S1a Conductance
	GluA4			GluA4c
	File	Conductance (ps)		File	Conductance (ps)
	2017_04_27_0000	15.8151		2017_04_21_0035	12.2313
	2017_04_27_0001	13.4402		2017_04_21_0040	26.0436
	2017_05_05_0005	14.3213		2017_04_25_0003	19.7164
	2017_05_05_0009	15.7571		2017_04_25_0018	15.1438
	2017_05_05_0011	20.06		2017_04_28_0006	19.4255
	2017_05_31_0017	16.1316		2017_05_31_0022	15.9384
	2017_06_07_0000	20.9091		2017_06_07_0009	13.6947
	Mean	16.6335		2017_06_07_0016	17.5075
	S.E.M.	1.06072		2017_06_07_0020	17.6975
	N	7		2017_06_07_0024	17.9985
				Median	17.5397
				S.E.M.	1.21159
				N	10
	STATISTICAL ANALYSIS
	Comparison	Test	p-value	Graphic
	GluA4 vs GluA4c	Student's t-test	0.6029	ns

## Sheet: S1b Popen
	GluA4			GluA4c
	File	Peak Open Probability		File	Peak Open Probability
	2017_04_27_0000	0.841101		2017_04_21_0035	0.90883
	2017_04_27_0001	0.427241		2017_04_21_0040	0.585433
	2017_05_05_0005	0.762112		2017_04_25_0003	0.0800996
	2017_05_05_0009	0.580319		2017_04_25_0018	0.116539
	2017_05_05_0011	0.547909		2017_04_28_0006	0.308895
	2017_05_31_0017	0.648351		2017_05_31_0022	0.106385
	2017_06_07_0000	0.0480799		2017_06_07_0009	0.781797
	Mean	0.55073		2017_06_07_0016	0.269672
	S.E.M.	0.0984786		2017_06_07_0020	0.347891
	N	7		2017_06_07_0024	0.286443
				Mean	0.379198
				S.E.M.	0.0909534
				N	10
	STATISTICAL ANALYSIS
	Comparison	Test	p-value	Graphic
	GluA4 vs GluA4c	Student's t-test	0.2298	ns

## Sheet: S1c Desen
	GluA4			GluA4c
	File	Desensitization weighted time constant (ms)		File	Desensitization weighted time constant (ms)
	2017_04_27_0000	4.08386		2017_04_21_0035	6.38922
	2017_04_27_0001	4.01797		2017_04_21_0040	5.07611
	2017_04_27_0002	5.38842		2017_04_25_0003	2.50408
	2017_04_27_0018	2.59501		2017_04_25_0018	2.74473
	2017_05_05_0000	3.80142		2017_04_28_0006	4.93891
	2017_05_05_0005	3.6574		2017_05_31_0009	3.65722
	2017_05_05_0009	3.07589		2017_05_31_0022	5.18717
	2017_05_05_0011	2.64007		2017_06_07_0009	2.74009
	2017_05_31_0017	7.6203		2017_06_07_0013	5.27141
	2017_06_07_0000	2.56282		2017_06_07_0016	3.221
	2017_06_07_0005	1.69766		2017_06_07_0020	3.11432
	Mean	3.74007		2017_06_07_0024	2.73624
	S.E.M.	0.490815		Median	3.96504
	N	11		SEM	0.382038
				N	12
	STATISTICAL ANALYSIS
	Comparison	Test	p-value	Graphic
	GluA4 vs GluA4c	Student's t-test	0.7198	ns

## Sheet: S1e RI
	GluA4			GluA4c
	File	RI		File	RI
	2017_05_05_0001-3	0.0146799		2017_06_07_0017-19	0.0947002
	2017_05_05_0006-8	0.151464		2017_06_07_0021-23	0.00553066
	2017_05_05_0016-18	0.0034444		2017_06_07_0010-11	0.0465662
	2017_05_10_0001-3	0.171244		2017_06_07_0025-27	0.134518
	2017_06_07_0001-3	0.15		2017_04_21_0042-44	0.130691
	2017_06_07_0006-7	0		2017_04_21_0036-37	0.0650594
	Mean	0.0818054		Mean	0.0795108
	S.E.M.	0.0340786		S.E.M.	0.0205289
	N	6		N	6
	STATISTICAL ANALYSIS
	Comparison	Test	p-value	Graphic
	GluA4 vs GluA4c	Mann Whitney U-test	0.8983	ns
