# Supplementary material for: AMPAR/TARP stoichiometry differentially modulates channel properties
Source: eLife. 2020 May 26;9:e53946. doi: 10.7554/eLife.53946 (PMC7299370; doi:10.7554/eLife.53946)
Supplement: Figure 5—source data 1. [file elife-53946-fig5-data1.xlsx]

## Sheet: Figure 5D Conductance
	0 TARPs (A2+A4c)				2 TARPs (A2 + A4c:g2)				2 TARPs (A2:g2 + A4c )				4 TARPs (A2:g2 + A4c:g2 )
	File	Conductance (pS)	RI		File	Conductance (pS)	RI		File	Conductance (pS)	RI		File	Conductance (pS)	RI
	2017_04_21_0007	4.02127	1.07293		2018_03_16_0003	4.46873	0.933595		2017_05_03_0035	12.2307	0.718153		2018_04_06_0007	15.8482	0.799364
	2017_05_03_0017	3.68127	0.940011		2018_03_29_0001	16.6822	1.29726		2017_05_03_0045	11.3218	1.29144		2018_04_06_0008	10.9313	0.916531
	2017_05_03_0025	6.38473	1.10255		2018_03_29_0006	10.3467	1.09584		2017_05_03_0064	19.61	1.02		2018_04_06_0012	9.58036	0.904959
	2017_05_03_0087	5.88691	0.825905		2018_03_29_0012	21.4509	0.876533		2017_05_12_0024	23.5909	0.795561		2018_04_19_0002	15.9	0.965124
	2017_05_04_0041	6.75109	0.794096		2018_03_29_0022	6.66909	0.893573		2017_05_19_0021	15.2776	0.791033		2018_05_10_0010	10.0513	0.85133
	2017_05_04_0050	2.66073	1.11321		2018_04_06_0006	6.93236	0.895563		2017_05_19_0035	9.652	1.16916		2018_05_16_0004	18.8764	0.933061
	2017_05_09_0037	6.01091	0.881577		2018_05_10_0005	5.80436	1.07015		2017_05_23_0011	12.8287	1.59879		2018_05_16_0005	16.3056	0.773587
	2017_05_09_0056	4.43709	0.738396		2018_05_18_0003	8.59382	1.17247		2017_05_23_0032	11.3158	0.906868		2018_05_16_0014	9.34764	0.990462
	2017_05_19_0070	3.97091	1.32949		2018_05_18_0011	14.2409	1.37235		2018_09_06_0022	21.9309	0.787195		2018_05_16_0024	25.9236	0.792941
	2017_05_10_0012	3.60455	0.961386		2018_05_18_0012	6.416	1.00399		2018_09_06_0028	20.7418	1.2983		2018_05_16_0034	12.7724	0.866532
	2017_06_13_0007	7.45109	0.769216		2018_05_18_0016	10.4384	1.08464		Mean	15.85			2018_05_16_0042	7.05455	0.985553
	2017_06_14_0034	3.28455	1.0479		2018_05_18_0017	5.96	1.46556		S.E.M.	1.62275			2018_05_18_0035	8.79691	0.965729
	2017_06_14_0036	8.55509	0.887		2018_05_18_0018	3.74691	0.942495		N	10			2018_05_18_0036	12.7229	0.908898
	Mean	5.13078			2018_05_18_0034	6.95927	1.18113						2018_06_21_0003	11.7945	1.05507
	S.E.M.	0.50416			2018_06_20_0002	7.50636	1.07275		%increase vs 0 TARP	308.92			2018_06_21_0010	8.86109	0.701146
	N	13			2018_06_20_0021	18.8673	1.05939						2018_06_21_0015	10.9987	0.965365
					2018_09_17_0002	8.44145	1.57931						2018_06_21_0018	14.7916	0.918224
					2018_09_17_0003	13.3435	1.10456						2018_06_21_0020	3.53091	0.925203
					2018_09_17_0008	6.24818	1.18118						2018_06_21_0028	9.20364	0.839698
					2018_09_17_0016	11.2844	1.04483						2018_06_21_0030	18.1538	0.766523
					Mean	9.72004							Mean	12.5723
					S.E.M.	1.0941							S.E.M.	1.1156
					N	20							N	20
					%increase vs 0 TARP	189.445
						STATISTICAL ANALYSIS
	STATISTICAL ANALYSIS					Ordinary one-way ANOVA with Newman-Keuls multiple comparisons post-hoc test
	Comparison	Test	p-value	Graphic		Comparison	Mean Diff.	Significant?	Summary
	0 TARPs vs 2 TARPs A4c	Student's t-test	0.003	**		0 TARPs vs 2 TARPs A4c	-4.59	Yes	**
	0 TARPs vs 2 TARPs A2	Student's t-test	< 0.0001	****		0 TARPs vs 2 TARPs A2	-10.72	Yes	****
	0 TARPs vs 4 TARPs	Student's t-test	< 0.0001	****		0 TARPs vs 4 TARPs	-7.442	Yes	****
	2 TARPs A4c vs 2 TARPs A2	Student's t-test	0.0035	**		2 TARPs A4c vs 2 TARPs A2	-6.13	Yes	**
	2 TARPs A4c vs 4 TARPs	Student's t-test	0.0758	ns		2 TARPs A4c vs 4 TARPs	-2.852	No	ns
	2 TARPs A2 vs 4 TARPs	Student's t-test	0.1039	ns		2 TARPs A2 vs 4 TARPs	3.279	No	ns
						F Value = 12.37
						P Value < 0.0001

## Sheet: Figure 5E Popen
	0 TARPs (A2+A4c)				2 TARPs (A2 + A4c:g2)				2 TARPs (A2:g2 + A4c )				4 TARPs (A2:g2 + A4c:g2 )
	File	Peak Open Probability	RI		File	Peak Open Probability	RI		File	Peak Open Probability	RI		File	Peak Open Probability	RI
	2017_04_21_0007	0.327994	1.07293		2018_03_29_0006	0.4167	1.09584		2017_05_03_0035	0.388642	0.718153		2018_04_06_0007	0.804217	0.799364
	2017_05_03_0017	0.708778	0.940011		2018_03_29_0012	0.630693	0.876533		2017_05_03_0045	0.271714	1.29144		2018_04_06_0008	0.605746	0.916531
	2017_05_03_0025	0.776345	1.10255		2018_04_06_0006	0.266507	0.895563		2017_05_03_0064	0.65	1.50191		2018_04_06_0012	0.598348	0.904959
	2017_05_03_0087	0.592117	0.825905		2018_05_18_0012	0.193987	1.00399		2017_05_12_0024	0.539817	0.795561		2018_04_19_0002	0.692868	0.965124
	2017_05_04_0041	0.411124	0.794096		2018_05_18_0017	0.447962	1.46556		2017_05_19_0021	0.320079	0.791033		2018_05_10_0010	0.375836	0.85133
	2017_05_04_0050	0.341751	1.11321		2018_05_18_0017	0.447962	1.46556		2017_05_19_0035	0.217645	1.16916		2018_05_16_0003	0.344935	0.793055
	2017_05_09_0037	0.443541	0.881577		2018_06_20_0002	0.62497	1.07275		2017_05_23_0011	0.755538	1.59879		2018_05_16_0004	0.753029	0.933061
	2017_05_09_0056	0.193943	0.738396		2018_06_20_0021	0.469069	1.05939		2017_05_23_0016	0.548222	1.35814		2018_05_16_0005	0.654269	0.773587
	2017_05_19_0070	0.645309	1.32949		2018_09_17_0002	0.303447	1.57931		2017_05_23_0032	0.963431	0.906868		2018_05_16_0014	0.59236	0.990462
	2017_05_10_0012	0.417814	0.961386		2018_09_17_0003	0.653085	1.10456		Mean	0.517232			2018_05_16_0024	0.625722	0.792941
	2017_06_13_0007	0.438657	0.769216		2018_09_17_0016	0.612173	1.04483		S.E.M.	0.0816851			2018_05_16_0034	0.465098	0.866532
	Mean	0.481579			Mean	0.460596			N	9			2018_05_16_0042	0.658696	0.985553
	S.E.M.	0.0535746			S.E.M.	0.0478391							2018_05_18_0035	0.275931	0.965729
	N	11			N	11							2018_05_18_0036	0.460249	0.908898
													2018_06_21_0003	0.558638	1.05507
													2018_06_21_0010	0.251652	0.701146
													2018_06_21_0015	0.786606	0.965365
													2018_06_21_0018	0.617254	0.918224
													2018_06_21_0020	0.73121	0.925203
													2018_06_21_0028	0.604027	0.839698
													2018_06_21_0030	0.625406	0.766523
													Mean	0.575338
													S.E.M.	0.0345802
													N	21
						STATISTICAL ANALYSIS
	STATISTICAL ANALYSIS					Ordinary one-way ANOVA with Newman-Keuls multiple comparisons post-hoc test
	Comparison	Test	p-value	Graphic		Comparison	Mean Diff.	Significant?	Summary
	0 TARPs vs 2 TARPs A2	Student's t-test	0.7105	ns		0 TARPs vs 2 TARPs A4c	0.022	No	ns
	0 TARPs vs 2 TARPs A4c	Student's t-test	0.733	ns		0 TARPs vs 2 TARPs A2	-0.03596	No	ns
	0 TARPs vs 4 TARPs	Student's t-test	0.1376	ns		0 TARPs vs 4 TARPs	-0.0939	No	ns
	2 TARPs A4c vs 2 TARPs A2	Student's t-test	0.5133	ns		2 TARPs A4c vs 2 TARPs A2	-0.05796	No	ns
	2 TARPs A4c vs 4 TARPs	Student's t-test	0.0538	ns		2 TARPs A4c vs 4 TARPs	-0.1159	No	ns
	2 TARPs A2 vs 4 TARPs	Student's t-test	0.4428	ns		2 TARPs A2 vs 4 TARPs	-0.05794	No	ns
						F Value = 1.25
						P Value = 0.3021
