# Supplementary material for: AMPAR/TARP stoichiometry differentially modulates channel properties
Source: eLife. 2020 May 26;9:e53946. doi: 10.7554/eLife.53946 (PMC7299370; doi:10.7554/eLife.53946)
Supplement: Figure 6—figure supplement 1—source data 1. [file elife-53946-fig6-figsupp1-data1.xlsx]

## Sheet: S2c Perampanel
	0 TARPs (A2+A4c)				2 TARPs (A2 + A4c:g2)				2 TARPs (A2:g2 + A4c)				4 TARPs (A2:g2 + A4c:g2)
	File	Percentatge of blocking	RI		File	Percentatge of blocking	RI		File	Percentatge of blocking	RI		File	Percentatge of blocking	RI
	2018_12_13_0012	34.5456	1.02765		2018_12_12_0011	45.4842	1.20128		2019_01_22_0001	66.027	0.698904		2018_12_20_0006	66.562	1.20947
	2018_12_19_0003	50.0478	0.74411		2018_12_18_0002	44.7926	1.11836		2019_01_22_0002	40.918	0.759208		2018_12_20_0009	81.049	1.26816
	2019_02_01_0001	55.8159	1.16663		2018_12_18_0006	68.0866	1.25612		2019_01_22_0010	49.4663	0.992838		2019_02_01_0005	65.0676	1.26069
	2019_02_05_0013	45.0569	1.15349		2018_12_18_0007	79.3142	1.15991		2019_02_13_0009	36.2178	0.978285		2019_02_05_0011	100	1.27765
	2019_02_22_0002	29.2005	1.2862		2018_12_18_0008	65.0201	0.867991		2019_02_22_0014	38.0169	0.741281		2019_03_06_0003	52.6569	1.15558
	2019_02_22_0003	69.3245	0.998399		2018_12_18_0009	100	1.48143		Mean	46.1292			2019_03_06_0014	64.5323	1.45976
	Mean	47.3319			2018_12_18_0010	91.8517	1.95222		S.E.M.	5.46928			Mean	71.6446
	S.E.M.	5.94543			Mean	70.6499			N	5			S.E.M.	6.76431
	N	6			S.E.M.	8.05664							N	6
					N	7
	STATISTICAL ANALYSIS
	Comparison	Test	p-value	Graphic
	0 TARPs vs 4 TARPs	Student's t-test	0.0021	**
	0 TARPs vs 2 TARPs A4c	Student's t-test	0.045	*
	2 TARPs A4c vs 2 TARPs A2	Student's t-test	0.0444	*
	2 TARPs A2 vs 4 TARPs	Student's t-test	0.018	*
	0 TARPs vs 2 TARPs A2	Student's t-test	0.8874	ns
	2 TARPs A4c vs 4 TARPs	Student's t-test	0.9145	ns
