# Supplementary material for: AMPAR/TARP stoichiometry differentially modulates channel properties
Source: eLife. 2020 May 26;9:e53946. doi: 10.7554/eLife.53946 (PMC7299370; doi:10.7554/eLife.53946)
Supplement: Figure 6—figure supplement 2—source data 1. [file elife-53946-fig6-figsupp2-data1.xlsx]

## Sheet: Figure S3A 
	GluA4c(C550L):g2				GluA4c(C550L):g2
	File	Desensitization (ms)			File	Desensitization (ms)
	2019_07_03_0007	5.20928			2019_07_03_0015	3.1975
	2019_07_04_0003	2.66008			2019_07_03_0016	2.05689
	2019_07_04_0006	6.35872			2019_07_03_0024	3.09589
	2019_07_04_0011	3.97866			2019_07_03_0026	2.40429
	2019_07_04_0015	4.12521			2019_08_14_0002	5.35358
	2019_07_04_0019	8.21316			2019_08_14_0003	5.48108
	2019_08_07_0002	11.8128			Mean	3.5982
	2019_08_07_0020	7.69383			S.E.M.	0.601124
	2019_08_08_0002	7.8591			N	6
	2019_08_08_0003	7.51342
	2019_08_08_0004	3.93698
	Mean	6.30557
	S.E.M.	0.797957
	N	11
	STATISTICAL ANALYSIS
	Comparison	Test	p-value	Graphic
	A4c:g2 vs. A4c(C550L):g2	Student's t-test	0.036	*

## Sheet: Figure S3B 
	GluA4c(C550L):g2				GluA4c(C550L):g2
	File	Conductance (pS)			File	Conductance (pS)
	2019_07_03_0007	26.2273			2019_07_03_0016	15.6064
	2019_07_04_0003	30.6509			2019_07_03_0018	31.8418
	2019_07_04_0006	17.7378			2019_07_03_0024	13.6336
	2019_07_04_0011	24.5145			2019_07_03_0026	11.1109
	2019_07_04_0015	28.9309			2019_08_14_0002	16.3993
	2019_08_07_0002	17.8925			2019_08_14_0003	16.142
	2019_08_07_0020	24.3055			Mean	17.4557
	2019_08_08_0002	18.9455			S.E.M.	2.98935
	2019_08_08_0003	16.3295			N	6
	2019_08_08_0004	32.9
	Mean	23.8434
	S.E.M.	1.86706
	N	10
	STATISTICAL ANALYSIS
	Comparison	Test	p-value	Graphic
	A4c:g2 vs. A4c(C550L):g2	Student's t-test	0.031	*

## Sheet: Figure S3C 
	0T - GluA4c + GluA2				2T(A2) --- GluA4c + GluA2:g2				2T(A2) --- GluA4c + GluA2(C549L):g2
	File	Desensitization (ms)	RI		File	Desensitization (ms)	RI		File	Desensitization (ms)	RI
	2017_04_21_0007	6.38282	1.07293		2017_05_03_0035	7.60005	0.718153		2019_06_18_0019	2.37334	1.1604
	2017_05_03_0017	6.11761	0.940011		2017_05_03_0045	6.97253	1.29144		2019_06_18_0021	5.83856	0.947333
	2017_05_03_0025	5.08862	1.10255		2017_05_03_0064	6.44811	1.50191		2019_06_21_0021	6.30233	0.744035
	2017_05_03_0087	4.78429	0.825905		2017_05_12_0024	4.943	0.795561		2019_06_21_0023	8.33688	0.881817
	2017_05_04_0041	4.54072	0.794096		2017_05_19_0021	4.91626	0.791033		2019_06_21_0031	7.94846	0.810991
	2017_05_04_0050	4.02087	1.11321		2017_05_19_0035	3.70615	1.16916		2019_06_27_0001	5.22052	1.52779
	2017_05_09_0037	3.32877	0.881577		2017_05_23_0011	5.20783	1.59879		2019_06_27_0006-7	4.85588	1.16931
	2017_05_09_0056	3.42296	0.738396		2017_05_23_0032	6.00921	0.906868		2019_06_27_0010	6.90269	0.838301
	2017_05_19_0068	5.7856	1.27522		2018_09_06_0010	4.24955	0.718807		2019_06_27_0011	4.44919	1.1067
	2017_05_19_0070	3.94681	1.32949		2018_09_06_0022	3.42482	0.787195		2019_06_27_0031	4.24677	0.750395
	2017_05_10_0012	6.02879	0.961386		2018_09_06_0028	6.18623	1.2983		Mean	5.64746
	2017_06_13_0007	3.73567	0.769216		Mean	5.42398			S.E.M.	0.572471
	2017_06_14_0034	4.28443	1.0479		S.E.M.	0.404164			N	10
	2017_06_14_0036	5.19369	0.887		N	11
	Mean	4.76155
	S.E.M.	0.275384
	N	14
	STATISTICAL ANALYSIS
	Comparison	Test	p-value	Graphic
	2T wt vs. 2T-C549L	Student's t-test	0.7499

## Sheet: Figure S3D
	0T - GluA4c + GluA2				2T(A4c) --- GluA4c:g2 + GluA2				2T(A4c) --- GluA4c(C550L):g2 + GluA2
	File	Desensitization (ms)	RI		File	Desensitization (ms)	RI		File	Desensitization (ms)	RI
	2017_04_21_0007	6.38282	1.07293		2018_03_16_0003	9.77759	0.933595		2019_06_18_0003	9.36094	1.12365
	2017_05_03_0017	6.11761	0.940011		2018_03_29_0001	10.5675	1.29726		2019_06_18_0010	6.61296	1.31881
	2017_05_03_0025	5.08862	1.10255		2018_03_29_0006	5.95135	1.09584		2019_06_18_0014	6.66141	1.37957
	2017_05_03_0087	4.78429	0.825905		2018_03_29_0012	6.16186	0.876533		2019_06_21_0003	7.89348	0.941504
	2017_05_04_0041	4.54072	0.794096		2018_03_29_0022	10.8473	0.893573		2019_06_21_0004	6.77196	0.839897
	2017_05_04_0050	4.02087	1.11321		2018_04_06_0006	8.42634	0.895563		2019_06_21_0005	9.98721	0.611986
	2017_05_09_0037	3.32877	0.881577		2018_05_10_0004	4.86065	1.17003		2019_06_21_0008	6.3624	1.10137
	2017_05_09_0056	3.42296	0.738396		2018_05_10_0005	6.24577	1.07015		2019_06_21_0010	8.32472	0.804892
	2017_05_19_0068	5.7856	1.27522		2018_05_18_0003	7.08533	1.17247		2019_06_21_0043	4.37756	1.2742
	2017_05_19_0070	3.94681	1.32949		2018_05_18_0011	7.4599	1.37235		2019_06_21_0045	6.39092	0.952604
	2017_05_10_0012	6.02879	0.961386		2018_05_18_0012	7.43443	1.00399		2019_06_27_0017-18	6.84624	1.31531
	2017_06_13_0007	3.73567	0.769216		2018_05_18_0016	6.19655	1.08464		2019_06_27_0025	6.34818	0.888029
	2017_06_14_0034	4.28443	1.0479		2018_05_18_0017	7.18902	1.46556		Mean	7.1615
	2017_06_14_0036	5.19369	0.887		2018_05_18_0018	11.7089	0.942495		S.E.M.	0.436562
	Mean	4.76155			2018_05_18_0034	6.96169	1.18113		N	12
	S.E.M.	0.275384			2018_06_20_0002	4.43848	1.07275
	N	14			2018_06_20_0021	5.61024	1.05939
					2018_09_17_0002	6.24948	1.57931
					2018_09_17_0003	6.34028	1.10456
					2018_09_17_0008	5.67859	1.18118
					2018_09_17_0016	6.58756	1.04483
					Mean	7.22756
					S.E.M.	0.430419
					N	21
	STATISTICAL ANALYSIS
	Comparison	Test	p-value	Graphic
	2T wt vs. 2T-C550L	Student's t-test	0.9189

## Sheet: Figure S3E
	0T - GluA4c + GluA2				2T(A2) --- GluA4c + GluA2:g2				2T(A2) --- GluA4c + GluA2(C549L):g2
	File	Conductance (pS)	RI		File	Conductance (pS)	RI		File	Conductance (pS)	RI
	2017_04_21_0007	4.02127	1.07293		2017_05_03_0035	12.2307	0.718153		2019_06_21_0023	13.7367	0.881817
	2017_05_03_0017	3.68127	0.940011		2017_05_03_0045	11.3218	1.29144		2019_06_21_0031	28.4418	0.810991
	2017_05_03_0025	6.38473	1.10255		2017_05_03_0064	19.61	1.50191		2019_06_27_0001	10.9142	1.52779
	2017_05_03_0087	5.88691	0.825905		2017_05_12_0024	23.5909	0.795561		2019_06_27_0006-7	17.9018	1.16931
	2017_05_04_0041	6.75109	0.794096		2017_05_19_0021	15.2776	0.791033		2019_06_27_0010	9.69855	0.838301
	2017_05_04_0050	2.66073	1.11321		2017_05_19_0035	9.652	1.16916		2019_06_27_0011	11.0189	1.1067
	2017_05_09_0037	6.01091	0.881577		2017_05_23_0011	12.8287	1.59879		Mean	15.2853
	2017_05_09_0056	4.43709	0.738396		2017_05_23_0032	11.3158	0.906868		S.E.M.	2.89171
	2017_05_19_0070	3.97091	1.32949		2018_09_06_0022	21.9309	0.787195		N	6
	2017_05_10_0012	3.60455	0.961386		2018_09_06_0028	20.7418	1.2983
	2017_06_13_0007	7.45109	0.769216		Mean	15.85
	2017_06_14_0034	3.28455	1.0479		S.E.M.	1.62275
	2017_06_14_0036	8.55509	0.887		N	10
	Mean	5.13078
	S.E.M.	0.50416
	N	13
	STATISTICAL ANALYSIS
	Comparison	Test	p-value	Graphic
	2T wt vs. 2T-C549L	Student's t-test	0.8556

## Sheet: Figure S3F
	0T - GluA4c + GluA2				2T(A4c) --- GluA4c:g2 + GluA2				2T(A4c) --- GluA4c(C550L):g2 + GluA2
	File	Conductance (pS)	RI		File	Conductance (pS)	RI		File	Conductance (pS)	RI
	2017_04_21_0007	4.02127	1.07293		2018_03_16_0003	4.46873	0.933595		2019_06_18_0003	9.40145	1.12365
	2017_05_03_0017	3.68127	0.940011		2018_03_29_0001	16.6822	1.29726		2019_06_18_0014	7.12709	1.37957
	2017_05_03_0025	6.38473	1.10255		2018_03_29_0006	10.3467	1.09584		2019_06_21_0005	6.75091	0.611986
	2017_05_03_0087	5.88691	0.825905		2018_03_29_0012	21.4509	0.876533		2019_06_21_0008	5.75545	1.10137
	2017_05_04_0041	6.75109	0.794096		2018_03_29_0022	6.66909	0.893573		2019_06_21_0010	6.70291	0.804892
	2017_05_04_0050	2.66073	1.11321		2018_04_06_0006	6.93236	0.895563		2019_06_21_0043	2.78164	1.2742
	2017_05_09_0037	6.01091	0.881577		2018_05_10_0005	5.80436	1.07015		2019_06_21_0045	6.61873	0.952604
	2017_05_09_0056	4.43709	0.738396		2018_05_18_0003	8.59382	1.17247		2019_06_27_0017-18	4.45182	1.31531
	2017_05_19_0070	3.97091	1.32949		2018_05_18_0011	14.2409	1.37235		2019_06_27_0025	4.64745	0.888029
	2017_05_10_0012	3.60455	0.961386		2018_05_18_0012	6.416	1.00399		Mean	6.02638
	2017_06_13_0007	7.45109	0.769216		2018_05_18_0016	10.4384	1.08464		S.E.M.	0.633757
	2017_06_14_0034	3.28455	1.0479		2018_05_18_0017	5.96	1.46556		N	9
	2017_06_14_0036	8.55509	0.887		2018_05_18_0018	3.74691	0.942495
	Mean	5.13078			2018_05_18_0034	6.95927	1.18113
	S.E.M.	0.50416			2018_06_20_0002	7.50636	1.07275
	N	13			2018_06_20_0021	18.8673	1.05939
					2018_09_17_0002	8.44145	1.57931
					2018_09_17_0003	13.3435	1.10456
					2018_09_17_0008	6.24818	1.18118
					2018_09_17_0016	11.2844	1.04483
					Mean	9.72004
					S.E.M.	1.0941
					N	20
	STATISTICAL ANALYSIS
	Comparison	Test	p-value	Graphic
	2T wt vs. 2T-C550L	Mann Whitney U-test	0.0377	*
