# Supplementary material for: AMPAR/TARP stoichiometry differentially modulates channel properties
Source: eLife. 2020 May 26;9:e53946. doi: 10.7554/eLife.53946 (PMC7299370; doi:10.7554/eLife.53946)
Supplement: Figure 6—source data 1. [file elife-53946-fig6-data1.xlsx]

## Sheet: Figure 6C Desensitization
	0 TARPs (A2+A4c)				2 TARPs (A2 + A4c:g2)				2 TARPs (A2:g2 + A4c )				4 TARPs (A2:g2 + A4c:g2 )
	File	Desensitization weighted time constant (ms)	RI		File	Desensitization weighted time constant (ms)	RI		File	Desensitization weighted time constant (ms)	RI		File	Desensitization weighted time constant (ms)	RI
	2017_04_21_0007	6.38282	1.07293		2018_03_16_0003	9.77759	0.933595		2017_05_03_0035	7.60005	0.718153		2018_04_06_0007	10.0249	0.799364
	2017_05_03_0017	6.11761	0.940011		2018_03_29_0001	10.5675	1.29726		2017_05_03_0045	6.97253	1.29144		2018_04_06_0008	9.21535	0.916531
	2017_05_03_0025	5.08862	1.10255		2018_03_29_0006	5.95135	1.09584		2017_05_03_0064	6.44811	1.50191		2018_04_06_0012	9.91886	0.904959
	2017_05_03_0087	4.78429	0.825905		2018_03_29_0012	6.16186	0.876533		2017_05_12_0024	4.943	0.795561		2018_04_19_0002	17.0697	0.965124
	2017_05_04_0041	4.54072	0.794096		2018_03_29_0022	10.8473	0.893573		2017_05_19_0021	4.91626	0.791033		2018_05_10_0010	8.02716	0.85133
	2017_05_04_0050	4.02087	1.11321		2018_04_06_0006	8.42634	0.895563		2017_05_19_0035	3.70615	1.16916		2018_05_16_0003	6.34527	0.793055
	2017_05_09_0037	3.32877	0.881577		2018_05_10_0004	4.86065	1.17003		2017_05_23_0011	5.20783	1.59879		2018_05_16_0004	6.87299	0.933061
	2017_05_09_0056	3.42296	0.738396		2018_05_10_0005	6.24577	1.07015		2017_05_23_0032	6.00921	0.906868		2018_05_16_0014	11.8568	0.990462
	2017_05_19_0068	5.7856	1.27522		2018_05_18_0003	7.08533	1.17247		2018_09_06_0010	4.24955	0.718807		2018_05_16_0024	4.85226	0.792941
	2017_05_19_0070	3.94681	1.32949		2018_05_18_0011	7.4599	1.37235		2018_09_06_0022	3.42482	0.787195		2018_05_16_0034	6.6826	0.866532
	2017_05_10_0012	6.02879	0.961386		2018_05_18_0012	7.43443	1.00399		2018_09_06_0028	6.18623	1.2983		2018_05_16_0042	10.0634	0.985553
	2017_06_13_0007	3.73567	0.769216		2018_05_18_0016	6.19655	1.08464		Mean	5.42398			2018_05_18_0035	7.78524	0.965729
	2017_06_14_0034	4.28443	1.0479		2018_05_18_0017	7.18902	1.46556		S.E.M.	0.404164			2018_05_18_0036	5.52716	0.908898
	2017_06_14_0036	5.19369	0.887		2018_05_18_0018	11.7089	0.942495		N	11			2018_06_21_0003	8.54174	1.05507
	Mean	4.76155			2018_05_18_0034	6.96169	1.18113						2018_06_21_0010	9.11745	0.701146
	S.E.M.	0.275384			2018_06_20_0002	4.43848	1.07275						2018_06_21_0015	6.22974	0.965365
	N	14			2018_06_20_0021	5.61024	1.05939						2018_06_21_0018	5.36237	0.918224
					2018_09_17_0002	6.24948	1.57931						2018_06_21_0020	8.80202	0.925203
					2018_09_17_0003	6.34028	1.10456						2018_06_21_0028	8.74677	0.839698
					2018_09_17_0008	5.67859	1.18118						2018_06_21_0030	7.51271	0.766523
					2018_09_17_0016	6.58756	1.04483						Mean	8.42773
					Mean	7.22756							S.E.M.	0.611035
					S.E.M.	0.430419							N	20
					N	21
						STATISTICAL ANALYSIS
	STATISTICAL ANALYSIS					Ordinary one-way ANOVA with Newman-Keuls multiple comparisons post-hoc test
	Comparison	Test	p-value	Graphic		Comparison	Mean Diff.	Significant?	Summary
	0 TARPs vs 4 TARPs	Mann Whitney U-test	< 0.0001	****		0 TARPs vs 4 TARPs	-3.667	Yes	****
	0 TARPs vs 2 TARPs A4c	Student's t-test	0.0001	***		0 TARPs vs 2 TARPs A4c	-2.467	Yes	**
	2 TARPs A4c vs 2 TARPs A2	Student's t-test	0.011	*		2 TARPs A4c vs 2 TARPs A2	1.804	Yes	*
	2 TARPs A2 vs 4 TARPs	Mann Whitney U-test	0.0004	***		2 TARPs A2 vs 4 TARPs	-3.003	Yes	***
	2 TARPs A4c vs 4 TARPs	Mann Whitney U-test	0.1035	ns		2 TARPs A4c vs 4 TARPs	-1.199	No	ns
	0 TARPs vs 2 TARPs A2	Student's t-test	0.1753	ns		0 TARPs vs 2 TARPs A2	-0.6631	No	ns
						F Value = 11.16
						P Value < 0.0001

## Sheet: Figure 6D Rise-Time
	0 TARPs (A2+A4c)				2 TARPs (A2 + A4c:g2)				2 TARPs (A2:g2 + A4c )				4 TARPs (A2:g2 + A4c:g2 )
	File	Rise-Time (ms)	RI		File	Rise-Time (ms)	RI		File	Rise-Time	RI		File	Rise-Time	RI
	2017_04_21_0007	0.916	1.07293		2018_03_16_0003	0.787	0.933595		2017_05_03_0035	0.496	0.718153		2018_04_06_0007	0.855	0.799364
	2017_05_03_0017	0.453	0.940011		2018_03_29_0001	0.731	1.29726		2017_05_03_0045	0.214	1.29144		2018_04_06_0008	0.271	0.916531
	2017_05_03_0025	0.254	1.10255		2018_03_29_0006	0.256	1.09584		2017_05_03_0064	0.282	1.50191		2018_04_06_0012	0.305	0.904959
	2017_05_03_0087	0.363	0.825905		2018_03_29_0012	0.253	0.876533		2017_05_12_0024	0.85	0.795561		2018_05_10_0010	0.237	0.85133
	2017_05_04_0041	0.349	0.794096		2018_03_29_0022	0.315	0.893573		2017_05_19_0021	0.246	0.791033		2018_05_16_0003	0.387	0.793055
	2017_05_04_0050	0.216	1.11321		2018_04_06_0006	0.401	0.895563		2017_05_19_0035	0.415	1.16916		2018_05_16_0004	0.299	0.933061
	2017_05_09_0037	0.354	0.881577		2018_05_10_0004	0.299	1.17003		2017_05_23_0011	1.013	1.59879		2018_05_16_0014	0.178	0.990462
	2017_05_09_0056	0.445	0.738396		2018_05_10_0005	0.45	1.07015		2017_05_23_0016	0.328	1.35814		2018_05_16_0024	0.594	0.792941
	2017_05_19_0068	0.62	1.27522		2018_05_18_0003	0.397	1.17247		2017_05_23_0032	0.288	0.906868		2018_05_16_0034	0.478	0.866532
	2017_05_19_0070	0.481	1.32949		2018_05_18_0011	0.772	1.37235		Mean	0.459111			2018_05_16_0042	0.423	0.985553
	2017_05_10_0012	0.513	0.961386		2018_05_18_0012	0.313	1.00399		S.E.M.	0.0947384			2018_05_18_0035	0.618	0.965729
	2017_06_13_0007	0.57	0.769216		2018_05_18_0016	0.613	1.08464		N	9			2018_05_18_0036	0.352	0.908898
	2017_06_14_0034	0.514	1.0479		2018_05_18_0017	0.453	1.46556						2018_06_21_0003	0.273	1.05507
	Mean	0.465231			2018_05_18_0018	0.994	0.942495						2018_06_21_0010	0.205	0.701146
	S.E.M.	0.0497853			2018_05_18_0034	1.297	1.18113						2018_06_21_0015	0.312	0.965365
	N	13			2018_06_20_0002	0.284	1.07275						2018_06_21_0018	0.314	0.918224
					2018_06_20_0021	0.289	1.05939						2018_06_21_0020	0.28	0.925203
					2018_09_17_0002	0.149	1.57931						2018_06_21_0028	0.517	0.839698
					2018_09_17_0008	0.402	1.18118						2018_06_21_0030	0.483	0.766523
					2018_09_17_0016	0.424	1.04483						Mean	0.388474
					Mean	0.49395							S.E.M.	0.0387954
					S.E.M.	0.0646043							N	19
					N	20
						STATISTICAL ANALYSIS
	STATISTICAL ANALYSIS					Ordinary one-way ANOVA with Newman-Keuls multiple comparisons post-hoc test
	Comparison	Test	p-value	Graphic		Comparison	Mean Diff.	Significant?	Summary
	0 TARPs vs 2 TARPs A2	Mann Whitney U-test	0.4021	ns		0 TARPs vs 2 TARPs A2	0.005231	No	ns
	0 TARPs vs 2 TARPs A4c	Mann Whitney U-test	0.6824	ns		0 TARPs vs 2 TARPs A4c	-0.02827	No	ns
	0 TARPs vs 4 TARPs	Mann Whitney U-test	0.1785	ns		0 TARPs vs 4 TARPs	0.07628	No	ns
	2 TARPs A4c vs 2 TARPs A2	Mann Whitney U-test	0.6685	ns		2 TARPs A4c vs 2 TARPs A2	0.0335	No	ns
	2 TARPs A4c vs 4 TARPs	Mann Whitney U-test	0.3189	ns		2 TARPs A4c vs 4 TARPs	0.1046	No	ns
	2 TARPs A2 vs 4 TARPs	Mann Whitney U-test	0.7999	ns		2 TARPs A2 vs 4 TARPs	0.07105	No	ns
						F Value = 0.6829
						P Value = 0.5661

## Sheet: Figure 6G Recovery Desens
		0 TARPS	A2 + A4c
		% Recovery			Recording
		AVERAGE	SEM	TIME INTERVAL	2017_05_03_0011-15	First Pulse	Second Pulse	% of Recovery		2017_05_03_0088-90	First Pulse	Second Pulse	% of Recovery		2017_05_04_0046-47	First Pulse	Second Pulse	% of Recovery		2017_05_04_0055-57	First Pulse	Second Pulse	% of Recovery		2017_05_09_0038-42	First Pulse	Second Pulse	% of Recovery		2017_05_09_0062-66	First Pulse	Second Pulse	% of Recovery
		0.572744	0.0377629	25		-29.3201	-18.822	0.641949			-209.12	-97.9598	0.468438			-54.538	-38.1501	0.699514			-14.2329	-8.73976	0.614053			-90.1662	-47.0632	0.521961			-40.0629	-19.6528	0.490549
		0.778411	0.0248744	50		-28.2976	-24.0557	0.850097			-204.029	-141.43	0.693186			-55.7421	-44.6032	0.800171			-12.6572	-10.5006	0.829615			-91.9102	-66.4707	0.723214			-38.5972	-29.8814	0.774186
		0.864996	0.0230139	75		-27.3884	-26.2898	0.959888			-204.806	-167.765	0.819141			-56.8267	-47.3052	0.832447			-12.792	-11.4492	0.895028			-91.5456	-74.3581	0.812252			-38.5793	-33.611	0.871219
		0.897153	0.0268924	100		-27.7527	-27.6307	0.995604			-199.913	-166.229	0.831507			-58.3363	-55.5897	0.952918			-13.3383	-11.4258	0.856616			-92.6673	-78.1409	0.843241			-38.1442	-34.4455	0.903034
		0.936422	0.0162497	125		-28.3344	-27.4494	0.968766			-197.412	-174.715	0.885027			-52.2155	-51.9103	0.994155			-12.9477	-11.9915	0.926149			-92.1707	-83.7113	0.90822			-38.2752	-35.8338	0.936215
		0.948867	0.0162648	150		-26.6937	-26.7548	1.00229			-197.432	-176.909	0.89605			-49.7246	-48.4429	0.974224			-13.7727	-13.3252	0.967508			-89.2053	-83.761	0.938969			-37.9699	-34.7107	0.914164
		0.942622	0.0180267	175		-27.8889	-26.5766	0.952945			-195.354	-188.755	0.96622			-51.8982	-45.0012	0.867105			-12.9265	-12.6823	0.981109			-90.6174	-82.7682	0.913381			-37.551	-36.6111	0.97497
		0.938231	0.0263263	200		-29.4603	-25.7066	0.872584			-192.797	-191.08	0.991094			-51.9976	-47.4505	0.912552			-13.8397	-12.3545	0.892686			-91.5186	-84.1333	0.919303			-36.7681	-38.2818	1.04117
		0.977399	0.0270215	225		-26.3149	-26.7726	1.01739			-196.969	-195.061	0.990313			-51.1618	-49.8801	0.974948			-12.577	-10.8273	0.860881			-87.3453	-84.1715	0.963664			-35.4277	-37.454	1.0572
		0.943381	0.0236092	250		-29.013	-25.6561	0.884297			-190.73	-192.294	1.0082			-50.8862	-45.7898	0.899847			-11.7858	-11.9689	1.01554			-88.1075	-83.8839	0.952063			-39.1956	-35.2894	0.900341
		0.978597	0.0156858	275		-26.1568	-26.1568	1			-190.841	-176.307	0.923842			-46.285	-44.9422	0.970988			-12.3331	-12.0686	0.978554			-88.3304	-84.8148	0.960199			-35.9782	-37.3454	1.038
		0.963938	0.011621	300		-27.5783	-26.7849	0.971231			-180.268	-175.08	0.971221			-46.0887	-43.0369	0.933784			-13.1201	-12.286	0.936426			-88.3079	-84.7313	0.959499			-36.1796	-36.5946	1.01147
		0.98998	0.0139905	325		-26.1114	-26.1724	1.00234			-186.922	-183.413	0.981227			-45.1798	-47.0414	1.0412			-12.5474	-12.0998	0.964327			-89.393	-84.4126	0.944286			-37.5603	-37.8044	1.0065
		0.970291	0.0134939	350		-28.5805	-28.1228	0.983986			-176.401	-179.72	1.01882			-46.7139	-45.4932	0.973869			-11.7853	-10.8087	0.917134			-87.8827	-84.8065	0.964997			-37.2296	-35.8502	0.962949
		0.993329	0.01601	375		-27.4006	-26.302	0.959906			-180.736	-174.975	0.968125			-40.8533	-43.3862	1.062			-11.465	-11.465	1			-87.8306	-84.5103	0.962197			-37.8356	-38.1286	1.00774
		0.979856	0.0173426	400		-27.0983	-24.84	0.916663			-183.992	-178.308	0.969107			-42.6115	-40.75	0.956315			-10.9519	-11.3385	1.0353			-87.1429	-85.9833	0.986693			-38.1091	-38.6829	1.01506
		0.984601	0.0273094	425		-24.8353	-27.4598	1.10568			-176.351	-166.585	0.944622			-46.0421	-44.8519	0.97415			-11.0531	-11.2159	1.01473			-88.1397	-82.6343	0.937538			-38.6827	-36.0094	0.930892
		0.985793	0.0162667	450		-26.0751	-26.2887	1.00819			-177.989	-176.616	0.992286			-45.3549	-47.3691	1.04441			-10.3205	-10.1578	0.984235			-88.3422	-84.3017	0.954263			-40.1986	-37.4398	0.931371
		1.00915	0.025289	475		-27.4615	-26.5155	0.965552			-171.562	-178.581	1.04091			-47.1885	-44.1978	0.936622			-10.5859	-11.7659	1.11147			-87.2378	-86.0415	0.986287			-36.446	-36.9587	1.01407
		1.01937	0.0267083	500		-25.1713	-24.7441	0.983028			-178.864	-173.562	0.970357			-45.198	-43.9773	0.972992			-10.8036	-12.1667	1.12617			-86.8272	-85.8018	0.98819			-36.7155	-39.4865	1.07547
		0.960388	0.0144863	525		-26.855	-26.2142	0.976139			-177.4	-169.351	0.954628			-44.7659	-44.4607	0.993182			-11.5858	-10.3447	0.892877			-87.7364	-84.8067	0.966608			-38.1744	-37.3687	0.978894
		1.00469	0.00861333	550		-26.603	-26.9692	1.01377			-174.904	-174.064	0.995197			-41.1614	-40.9783	0.995552			-10.5444	-10.9106	1.03473			-85.2682	-86.5621	1.01517			-36.7361	-35.7717	0.973748
		0.96373	0.0202967	575		-25.8433	-25.4771	0.98583			-174.072	-164.42	0.944552			-39.9865	-39.4372	0.986263			-10.7023	-9.31888	0.870736			-85.9051	-85.1971	0.991758			-37.6497	-37.7718	1.00324
		1.01038	0.0087311	600		-25.8546	-26.465	1.02361			-166.665	-168.915	1.0135			-42.1816	-41.8459	0.992042			-10.6903	-10.6699	0.998092			-86.8585	-85.9918	0.990022			-36.0578	-37.6814	1.04503
		1.01957	0.0142007	625		-25.5879	-27.0528	1.05725			-164.696	-174.233	1.05791			-40.629	-40.8121	1.00451			-10.0276	-10.1497	1.01218			-87.0289	-84.0626	0.965916			-36.6743	-37.3945	1.01964
	Fitting values of t1
	Average and SEM values are used for a single-exponential fitting (constrain to 100)	MEAN	51.348
		SEM	8.18
		N	6
		2 TARPS	A2:g2 + A4c
		% Recovery			Recording
		AVERAGE	SEM	TIME INTERVAL	2017_05_03_0050-52	First Pulse	Second Pulse	% of Recovery		2017_05_03_0065-69	First Pulse	Second Pulse	% of Recovery		2017_05_12_0025-29	First Pulse	Second Pulse	% of Recovery		2017_05_19_0022-26	First Pulse	Second Pulse	% of Recovery		2017_05_19_0036	First Pulse	Second Pulse	% of Recovery		2018_09_06_0029-30	First Pulse	Second Pulse	% of Recovery
		0.222225	0.0631747	25		-61.4445	-14.9052	0.24258			-216.201	-109.145	0.504831			-190.214	-10.6177	0.0558198			-87.4704	-10.1389	0.115912			-33.4679	-6.91762	0.206694			-69.8929	-14.5035	0.20751
		0.354143	0.0844545	50		-63.7467	-17.0548	0.26754			-208.511	-160.72	0.770799			-193.919	-62.0834	0.320151			-80.4379	-21.9052	0.272324			-39.4496	-8.47426	0.214812			-71.7666	-20.0393	0.279229
		0.461097	0.0933189	75		-63.7839	-18.923	0.296674			-217.04	-187.316	0.863048			-196.421	-116.679	0.594025			-82.9425	-27.1563	0.327411			-41.6912	-11.4788	0.275329			-70.8742	-29.0651	0.410094
		0.558049	0.0976179	100		-61.5368	-28.2726	0.459442			-217.694	-203.778	0.936075			-189.161	-131.086	0.692986			-85.1352	-31.4853	0.369827			-35.8454	-10.058	0.280594			-73.8267	-44.9875	0.609366
		0.624571	0.0940894	125		-57.9243	-28.3223	0.488954			-216.18	-201.776	0.93337			-193.23	-153.404	0.793893			-83.6442	-34.4498	0.411861			-34.085	-12.7227	0.373264			-69.708	-52.0078	0.746081
		0.730939	0.0883332	150		-53.1338	-29.9404	0.563491			-212.651	-216.526	1.01822			-194.919	-172.03	0.882572			-83.7001	-38.0763	0.454913			-38.8499	-24.2015	0.622949			-75.0699	-63.3206	0.843489
		0.76019	0.0943348	175		-56.7794	-26.1093	0.459838			-210.225	-207.967	0.989259			-191.512	-176.924	0.923827			-78.6225	-39.2243	0.498894			-32.1784	-24.3964	0.758161			-66.4957	-61.9181	0.931159
		0.812696	0.103534	200		-65.6764	-33.0226	0.502808			-217.23	-216.924	0.998591			-188.525	-173.175	0.918578			-85.2408	-40.2884	0.472642			-31.4563	-31.1511	0.990298			-67.9214	-67.4636	0.99326
		0.82193	0.104151	225		-62.4843	-29.5253	0.472523			-214.023	-217.075	1.01426			-184.683	-179.342	0.97108			-85.1883	-44.7525	0.525336			-38.2731	-34.6109	0.904314			-62.3229	-65.0694	1.04407
		0.868833	0.0837755	250		-59.9561	-43.0188	0.717505			-203.502	-211.924	1.04139			-190.668	-177.668	0.931819			-85.0372	-45.3949	0.533824			-39.4569	-42.0509	1.06574			-69.1071	-63.7665	0.92272
		0.847042	0.0641668	275		-54.8497	-37.6073	0.685643			-217.378	-215.913	0.993261			-201.9	-184.474	0.91369			-80.3346	-50.0612	0.623159			-40.4562	-35.4208	0.875535			-67.5611	-66.9508	0.990967
		0.84169	0.076311	300		-62.78	-37.603	0.598965			-215.032	-208.318	0.968777			-193.291	-185.784	0.961162			-82.4088	-49.6634	0.602647			-34.5576	-32.574	0.9426			-63.5521	-62.0262	0.97599
		0.831982	0.073468	325		-60.3161	-33.9184	0.562344			-207.726	-207.116	0.997063			-187.539	-178.598	0.952325			-85.1869	-56.3478	0.661461			-31.4971	-30.429	0.966089			-74.5384	-63.5521	0.852609
		0.854115	0.0739296	350		-62.6143	-36.6744	0.585719			-205.929	-208.736	1.01363			-192.137	-183.623	0.955688			-82.9388	-57.0904	0.688344			-34.3512	-29.4684	0.857856			-78.0751	-79.9061	1.02345
		0.941313	0.0807973	375		-55.8916	-38.6492	0.691503			-217.182	-222.339	1.02375			-188.222	-187.307	0.995139			-81.4509	-58.8984	0.723115			-34.8902	-42.2145	1.20992			-68.5662	-68.8714	1.00445
		0.945347	0.0691846	400		-51.1151	-33.4149	0.653719			-215.133	-214.371	0.996458			-186.021	-184.801	0.993442			-79.9997	-67.4875	0.843597			-40.8987	-44.7134	1.09327			-68.3036	-74.5597	1.09159
		0.845636	0.0682706	425		-59.2556	-41.0976	0.693565			-217.13	-215.085	0.990582			-178.855	-171.774	0.960409			-76.8239	-63.0605	0.820845			-40.6773	-24.6556	0.606127			-66.7178	-66.8703	1.00229
		0.908042	0.0380902	450		-61.7052	-45.3783	0.735405			-211.955	-207.652	0.979699			-178.622	-176.302	0.987012			-78.0299	-68.9051	0.88306			-33.6671	-30.7679	0.913886			-66.069	-62.7121	0.949191
		0.925719	0.0458926	475		-56.1523	-41.1987	0.733696			-211.491	-212.681	1.00563			-182.391	-178.057	0.976238			-81.401	-68.7667	0.844789			-30.0345	-30.4923	1.01524			-71.7166	-70.1907	0.978723
		0.916701	0.0386233	500		-58.1558	-45.1858	0.776978			-217.372	-225.123	1.03566			-188.155	-184.676	0.98151			-80.1368	-72.3853	0.903272			-35.5728	-30.0796	0.845579			-67.749	-64.8499	0.957208
		0.920515	0.0397057	525		-58.6474	-43.8463	0.747626			-213.135	-210.084	0.985685			-184.562	-175.804	0.952547			-79.4307	-72.8389	0.917012			-34.2528	-30.5907	0.893086			-67.4834	-69.3145	1.02713
		0.995304	0.0405826	550		-48.586	-41.7195	0.858673			-206.842	-220.514	1.0661			-180.383	-171.838	0.952629			-80.7026	-74.0497	0.917563			-31.6439	-33.9327	1.07233			-61.309	-67.7177	1.10453
		0.915248	0.0384849	575		-56.6643	-41.7107	0.736102			-214.245	-216.076	1.00855			-187.07	-173.001	0.924793			-81.284	-76.2792	0.938428			-35.6647	-34.5966	0.970052			-68.8479	-62.897	0.913565
		0.967218	0.0597472	600		-52.2097	-42.2915	0.810031			-215.281	-209.666	0.973918			-183.368	-180.652	0.985188			-79.1415	-70.4745	0.890487			-29.0316	-35.8981	1.23652			-67.3896	-61.1335	0.907165
		0.963288	0.0254354	625		-49.2679	-45.148	0.916378			-211.356	-215.69	1.02051			-178.539	-180.614	1.01162			-81.443	-71.4943	0.877845			-36.0701	-33.6287	0.932315			-65.1931	-66.5664	1.02107
	Fitting values of t1
	Average and SEM values are used for a single-exponential fitting (constrain to 100)	MEAN	143.75
		SEM	2.72
		N	6
		2 TARPS	A2+A4c:g2
		% Recovery			Recording
		AVERAGE	SEM	TIME INTERVAL	2018_03_29_0013-15	First Pulse	Second Pulse	% of Recovery		2018_05_18_0004-6	First Pulse	Second Pulse	% of Recovery		2018_05_18_0028-30	First Pulse	Second Pulse	% of Recovery		2018_05_10_0006-07	First Pulse	Second Pulse	% of Recovery		2018_06_20_0003-5	First Pulse	Second Pulse	% of Recovery		2018_06_20_0022-24	First Pulse	Second Pulse	% of Recovery		2018_09_17_0017-21	First Pulse	Second Pulse	% of Recovery
		0.529029	0.0515451	25		-97.8317	-57.9554	0.592399			-46.9775	-20.8341	0.443491			-25.6893	-6.97183	0.27139			-24.3394	-15.0316	0.617583			-204.742	-101.959	0.497988			-66.2035	-41.4843	0.626618			-31.1403	-20.3574	0.653732
		0.692286	0.0676063	50		-93.0559	-79.6281	0.855702			-49.1223	-33.3041	0.677983			-26.9036	-8.84736	0.328854			-27.0874	-17.2455	0.636661			-198.709	-147.277	0.741169			-69.6212	-58.6145	0.841906			-34.4434	-26.3054	0.763728
		0.826453	0.043274	75		-93.0319	-87.7422	0.943141			-44.2131	-40.2967	0.91142			-26.0461	-16.2296	0.623111			-25.1418	-20.1827	0.802755			-207.926	-172.872	0.831411			-68.2612	-63.1546	0.92519			-37.1596	-27.8008	0.748146
		0.897689	0.0423423	100		-92.1146	-89.5714	0.972391			-42.3121	-44.0923	1.04207			-26.1038	-20.6615	0.791513			-26.6146	-19.2903	0.724801			-206.083	-183.5	0.890418			-64.3931	-63.3148	0.983254			-34.5746	-30.4039	0.879371
		0.879809	0.0432062	125		-88.5243	-94.7296	1.0701			-44.8962	-40.6237	0.904836			-27.3998	-22.2118	0.810656			-25.2595	-17.6301	0.697959			-207.556	-186.031	0.896293			-69.2549	-64.3924	0.929788			-33.6903	-28.6041	0.849031
		0.981105	0.0255006	150		-91.0601	-94.3153	1.03575			-45.8803	-46.9993	1.02439			-23.5959	-25.2235	1.06898			-24.974	-21.7697	0.871695			-200.483	-195.702	0.976153			-66.879	-63.8679	0.954977			-31.6885	-29.654	0.935797
		0.927861	0.0356463	175		-94.1889	-96.4268	1.02376			-49.8058	-42.329	0.849881			-25.4774	-24.0533	0.944103			-26.1507	-21.039	0.804529			-200.895	-182.849	0.910172			-64.9335	-69.6332	1.07238			-33.3543	-29.6922	0.890206
		0.963769	0.0391607	200		-99.6644	-94.0695	0.943863			-45.7303	-43.7466	0.956622			-23.4035	-27.3708	1.16952			-25.4281	-22.3001	0.876986			-203.413	-188.093	0.924685			-63.8478	-64.6209	1.01211			-33.3174	-28.7397	0.862603
		0.935553	0.0327158	225		-98.8528	-96.2079	0.973244			-44.7552	-41.7034	0.931811			-27.13	-25.5532	0.94188			-27.3662	-23.3226	0.852241			-192.265	-191.492	0.99598			-65.3503	-68.931	1.05479			-37.4363	-29.9086	0.79892
		0.977071	0.0326232	250		-96.0079	-97.7373	1.01801			-44.9885	-44.1747	0.981911			-25.4705	-27.7593	1.08986			-25.4662	-23.0248	0.904132			-204.335	-189.666	0.928211			-64.2664	-68.3354	1.06331			-34.851	-29.7647	0.854056
		0.937593	0.0489158	275		-98.0731	-95.53	0.974069			-44.1694	-44.678	1.01151			-26.4374	-27.0986	1.02501			-28.741	-19.4332	0.676149			-192.552	-183.478	0.952875			-64.4905	-67.8475	1.05205			-34.0343	-29.6601	0.871477
		0.994294	0.0238914	300		-87.1786	-90.1286	1.03384			-50.1916	-43.9355	0.875356			-23.1918	-25.0229	1.07895			-23.3068	-23.4594	1.00655			-191.204	-190.818	0.997981			-65.1602	-65.323	1.0025			-34.7612	-33.5405	0.964883
		1.00446	0.0468331	325		-90.7436	-99.1868	1.09304			-43.387	-45.3198	1.04455			-24.0543	-28.7845	1.19665			-26.3621	-21.3267	0.808991			-197.81	-184.057	0.930474			-65.6741	-65.5317	0.997832			-32.8073	-31.4849	0.959692
		1.00623	0.0372645	350		-94.1846	-96.9312	1.02916			-44.1598	-47.3133	1.07141			-25.4985	-28.652	1.12367			-25.0144	-22.573	0.9024			-191.264	-188.924	0.987766			-63.2746	-53.9362	0.852415			-31.8047	-34.2461	1.07676
		0.966045	0.0297912	375		-88.2916	-95.209	1.07835			-44.0164	-45.5423	1.03467			-24.0144	-23.9126	0.995761			-22.5239	-21.3032	0.945804			-194.212	-187.925	0.967628			-66.7365	-58.7816	0.880801			-36.8743	-31.6863	0.859306
		0.981028	0.0252399	400		-95.0812	-92.4364	0.972184			-51.1811	-43.2974	0.845965			-25.6627	-26.6799	1.03964			-20.2078	-20.5893	1.01888			-200.602	-193.908	0.96663			-60.2066	-62.5463	1.03886			-33.9974	-33.4887	0.985037
		0.980765	0.0467085	425		-89.4549	-92.3032	1.03184			-45.3033	-45.8119	1.01123			-22.8378	-25.7879	1.12918			-25.0911	-18.2247	0.726341			-191.581	-189.913	0.991293			-62.129	-59.8911	0.96398			-35.4016	-35.8085	1.01149
		1.01946	0.0242696	450		-89.2476	-94.1304	1.05471			-41.002	-41.7141	1.01737			-22.8815	-24.0513	1.05112			-23.5765	-21.1351	0.896448			-190.081	-189.715	0.998075			-63.298	-64.3153	1.01607			-33.7572	-37.2158	1.10246
		0.965817	0.0187706	475		-89.5164	-92.7716	1.03636			-46.2074	-40.8669	0.884423			-25.863	-24.1337	0.933136			-24.5228	-24.5991	1.00311			-183.255	-180.102	0.982794			-60.4759	-58.9297	0.974433			-34.1986	-32.3675	0.946457
		1.01154	0.0300339	500		-94.5505	-93.7367	0.991393			-44.3098	-41.1563	0.928831			-23.9167	-24.7305	1.03403			-22.285	-21.3695	0.958919			-187.642	-186.726	0.995118			-60.783	-60.5999	0.996988			-37.6765	-44.2887	1.1755
		0.922163	0.0573102	525		-97.0372	-92.8664	0.957019			-42.6724	-45.6733	1.07032			-24.335	-24.1824	0.993729			-22.4455	-13.748	0.612506			-184.538	-179.493	0.972661			-59.8143	-59.7736	0.99932			-37.8718	-32.1752	0.849582
		0.942122	0.044682	550		-94.0944	-96.0272	1.02054			-43.8671	-43.8163	0.998842			-27.5294	-22.6974	0.824479			-23.0673	-16.8875	0.732097			-195.208	-188.962	0.968003			-58.6308	-61.9674	1.05691			-33.7878	-33.5844	0.99398
		0.947248	0.0274319	575		-95.108	-91.039	0.957217			-44.7973	-46.0689	1.02839			-23.2842	-22.3687	0.960681			-20.7987	-16.6025	0.798247			-195.573	-185.4	0.947984			-59.3005	-59.1378	0.997256			-34.4639	-32.4294	0.940967
		0.965245	0.0184413	600		-90.5653	-91.1757	1.00674			-43.0482	-41.624	0.966916			-24.5668	-22.5831	0.919253			-20.7862	-18.4211	0.886218			-181.726	-184.839	1.01713			-56.8764	-57.0595	1.00322			-33.3064	-31.8822	0.957239
		0.994731	0.0172646	625		-95.4219	-89.2167	0.934971			-42.924	-43.7378	1.01896			-25.5433	-25.3398	0.992033			-21.1578	-21.463	1.01442			-185.126	-188.219	1.01671			-55.2269	-58.2176	1.05415			-31.3551	-29.2189	0.931871
	Fitting values of t1
	Average and SEM values are used for a single-exponential fitting (constrain to 100)	MEAN	60.618
		SEM	4.73
		N	7
		4 TARPS	A2:g2 +A4c:g2
		% Recovery			Recording
		AVERAGE	SEM	TIME INTERVAL	2018_04_06_0015-18	First Pulse	Second Pulse	% of Recovery		2018_04_06_0011	First Pulse	Second Pulse	% of Recovery		2018_05_10_0011-13	First Pulse	Second Pulse	% of Recovery		2018_05_16_0009-11	First Pulse	Second Pulse	% of Recovery		2018_05_16_0043-0045	First Pulse	Second Pulse	% of Recovery		2018_06_21_0004-5	First Pulse	Second Pulse	% of Recovery		2018_06_21_0025-27	First Pulse	Second Pulse	% of Recovery
		0.640364	0.0443067	25		-38.9702	-21.5752	0.553633			-65.2881	-48.8086	0.747588			-45.4183	-30.6173	0.674118			-69.1036	-38.9421	0.563532			-234.849	-108.354	0.461377			-66.3345	-52.1438	0.786074			-322.815	-224.751	0.696222
		0.722366	0.0503455	50		-45.7648	-27.3017	0.596565			-66.6026	-57.4474	0.86254			-44.7417	-35.5355	0.794237			-71.6884	-45.545	0.635319			-237.133	-125.031	0.527261			-65.3923	-55.0926	0.842494			-324.546	-259.035	0.798146
		0.803493	0.0502373	75		-40.8034	-29.5119	0.723271			-69.1269	-60.582	0.876388			-43.5236	-40.4718	0.929882			-68.1149	-56.2131	0.825269			-236.384	-127.69	0.54018			-68.0259	-60.3202	0.886724			-320.521	-270.116	0.84274
		0.847202	0.0536115	100		-40.9374	-32.2399	0.787541			-66.5198	-64.6887	0.972473			-44.8782	-41.3178	0.920665			-67.9556	-58.8003	0.865275			-246.535	-136.977	0.555609			-71.4053	-67.3618	0.943373			-317.553	-281.186	0.885477
		0.874413	0.0580402	125		-41.9397	-30.9534	0.738045			-62.5909	-61.3702	0.980497			-42.1593	-40.5317	0.961394			-65.5803	-65.1734	0.993795			-244.326	-143.669	0.588022			-72.2618	-69.2863	0.958823			-319.401	-287.561	0.900313
		0.867614	0.040542	150		-39.9351	-31.6953	0.79367			-68.5104	-65.4587	0.955456			-45.9527	-43.3079	0.942445			-68.4145	-59.5644	0.87064			-238.331	-157.459	0.660674			-72.1132	-68.1459	0.944985			-314.092	-284.388	0.905429
		0.903434	0.0464695	175		-41.9145	-34.1325	0.814336			-67.6893	-67.6893	1			-40.9975	-41.6587	1.01613			-65.9251	-63.7888	0.967595			-243.052	-162.994	0.670614			-70.7065	-67.3496	0.952523			-313.577	-283.111	0.902844
		0.933387	0.0413899	200		-38.1987	-34.6892	0.908125			-64.1405	-65.3612	1.01903			-42.0564	-39.4624	0.938321			-64.1488	-62.8773	0.980179			-238.511	-169.032	0.708697			-69.7397	-72.4863	1.03938			-308.409	-289.895	0.939969
		0.938858	0.0397836	225		-38.0574	-32.5643	0.855663			-57.0149	-57.0149	1			-39.7243	-39.0631	0.983355			-63.0286	-63.995	1.01533			-234.604	-174.026	0.741786			-70.8124	-73.2538	1.03448			-311.557	-293.298	0.941394
		0.942691	0.0327653	250		-37.406	-33.7439	0.902099			-57.2135	-54.772	0.957327			-39.3242	-42.0199	1.06855			-68.5011	-68.552	1.00074			-235.584	-185.637	0.787986			-72.4164	-68.6017	0.947323			-310.515	-290.272	0.934808
		0.938405	0.0340995	275		-37.9651	-40.254	1.06029			-60.4796	-58.6486	0.969725			-41.8988	-38.8979	0.928377			-65.5532	-62.1963	0.948791			-233.155	-176.901	0.758727			-71.4594	-67.3395	0.942346			-307.05	-294.945	0.960576
		0.971991	0.025339	300		-38.7774	-38.3197	0.988197			-52.6364	-52.0261	0.988405			-41.9241	-39.8896	0.951472			-65.0837	-70.6277	1.08518			-227.548	-195.098	0.857393			-73.9093	-71.6205	0.969032			-304.53	-293.645	0.964256
		0.974591	0.0215971	325		-38.7363	-37.363	0.964547			-58.2161	-61.2678	1.05242			-41.4916	-39.6097	0.954644			-67.2653	-64.417	0.957656			-229.222	-201.553	0.879292			-71.9287	-74.4464	1.035			-301.447	-294.988	0.978573
		0.977582	0.0208754	350		-39.0424	-38.2795	0.98046			-58.8228	-61.2642	1.0415			-40.9395	-38.6507	0.944093			-65.2221	-66.9515	1.02652			-217.015	-191.431	0.88211			-73.0332	-73.8725	1.01149			-304.476	-291.354	0.956903
		0.965685	0.0295587	375		-39.8309	-37.2369	0.934875			-54.3323	-56.7737	1.04493			-40.3039	-38.1677	0.946998			-64.1175	-67.983	1.06029			-227.235	-187.308	0.824292			-73.1805	-71.5783	0.978106			-303.124	-294.121	0.970299
		0.954118	0.0162767	400		-40.5351	-39.3144	0.969885			-47.7719	-44.7201	0.936117			-39.3792	-40.5999	1.031			-75.6831	-67.7994	0.895833			-218.568	-201.479	0.921814			-76.1564	-72.7995	0.955921			-302.832	-293.219	0.968256
		1.00376	0.0241795	425		-37.7553	-39.8915	1.05658			-21.3452	-22.566	1.05719			-41.5373	-40.8252	0.982856			-63.1588	-69.0589	1.09342			-216.441	-201.996	0.933261			-77.1618	-73.3471	0.950562			-303.664	-289.219	0.952431
		0.994694	0.0295012	450		-37.3913	-42.4267	1.13467			-22.7572	-23.9779	1.05364			-38.6203	-35.3651	0.915713			-68.868	-65.0024	0.943869			-217.912	-202.247	0.928113			-74.0392	-74.3444	1.00412			-294.554	-289.468	0.982733
		1.0179	0.028412	475		-37.6953	-40.2893	1.06881			-20.4133	-21.634	1.0598			-39.4494	-38.7882	0.983239			-56.1725	-64.3106	1.14488			-223.259	-208.407	0.933476			-77.4624	-75.2499	0.971438			-303.429	-292.392	0.963626
		1.00201	0.0121629	500		-39.7654	-40.9861	1.0307			-23.4906	-24.7113	1.05197			-40.5644	-40.0049	0.986207			-65.6329	-63.751	0.971327			-217.247	-209.109	0.96254			-74.1565	-75.1483	1.01337			-294.893	-294.283	0.997931
		0.983499	0.0196453	525		-41.8124	-38.4555	0.919715			-20.998	-22.2187	1.05813			-39.3985	-40.721	1.03357			-63.7869	-64.3973	1.00957			-214.235	-203.706	0.950853			-74.8821	-70.0756	0.935812			-303.071	-296.052	0.97684
		1.01859	0.0222289	550		-38.2527	-36.269	0.948142			-20.4206	-22.2516	1.08966			-40.6109	-44.2222	1.08892			-63.8054	-65.2804	1.02312			-218.255	-205.895	0.943369			-76.3472	-78.3309	1.02598			-292.92	-296.124	1.01094
		0.992183	0.0328253	575		-39.2486	-34.8235	0.887255			-22.9838	-22.9838	1			-39.1665	-42.5742	1.08701			-67.2414	-62.5112	0.929653			-219.53	-204.169	0.930028			-75.019	-84.3269	1.12407			-295.582	-291.818	0.987266
		0.97833	0.0164806	600		-40.0767	-40.3819	1.00762			-20.4133	-19.8029	0.970098			-39.5775	-37.9499	0.958876			-61.0647	-64.7268	1.05997			-216.712	-208.269	0.96104			-78.6752	-72.648	0.923391			-298.771	-289.006	0.967316
		1.0266	0.0151796	625		-38.6964	-37.9335	0.980285			-20.7191	-20.7191	1			-40.3846	-44.0976	1.09194			-64.0101	-68.486	1.06992			-210.916	-214.985	1.01929			-73.4391	-75.1176	1.02286			-297.871	-298.431	1.00188
	Fitting values of t1
	Average and SEM values are used for a single-exponential fitting (constrain to 100)	MEAN	107.19
		SEM	9.29
		N	7

## Sheet: Figure 6G Statistics
	STATISTICAL ANALYSIS
	Comparison	Test	p-value	Graphic
	0 TARPs vs 2 TARPs A4c	Student's t-test	0.3306	ns
	0 TARPs vs 2 TARPs A2	Student's t-test	< 0.0001	****
	0 TARPs vs 4 TARPs	Student's t-test	0.001	**
	2 TARPs A4c vs 2 TARPs A2	Student's t-test	< 0.0001	****
	2 TARPs A4c vs 4 TARPs	Student's t-test	0.0008	***
	2 TARPs A2 vs 4 TARPs	Student's t-test	0.0048	**
	STATISTICAL ANALYSIS
	Ordinary one-way ANOVA with Newman-Keuls multiple comparisons post-hoc test
	Comparison	Mean Diff.	Significant?	Summary
	0 TARPs vs 2 TARPs A4c	-9.27	No	ns
	0 TARPs vs 2 TARPs A2	-92.4	Yes	****
	0 TARPs vs 4 TARPs	-55.84	Yes	****
	2 TARPs A4c vs 2 TARPs A2	-83.13	Yes	****
	2 TARPs A4c vs 4 TARPs	-46.57	Yes	****
	2 TARPs A2 vs 4 TARPs	36.56	Yes	**
	F Value = 37.14
	P Value < 0.0001
