# Supplementary material for: AMPAR/TARP stoichiometry differentially modulates channel properties
Source: eLife. 2020 May 26;9:e53946. doi: 10.7554/eLife.53946 (PMC7299370; doi:10.7554/eLife.53946)
Supplement: Figure 7—figure supplement 1—source data 1. [file elife-53946-fig7-figsupp1-data1.xlsx]

## Sheet: Figure S4
	2 TARPS	A2:g2 + A4c	AGONIST: GLUTAMATE
	% Recovery				2017_05_03_0050-52				2017_05_03_0065-69				2017_05_12_0025-29				2017_05_19_0022-26				2017_05_19_0036				2018_09_06_0029-30
	TIME INTERVAL	AVERAGE	SEM		First Pulse	Second Pulse	% of Recovery		First Pulse	Second Pulse	% of Recovery		First Pulse	Second Pulse	% of Recovery		First Pulse	Second Pulse	% of Recovery		First Pulse	Second Pulse	% of Recovery		First Pulse	Second Pulse	% of Recovery
	25	0.222225	0.0631747		-61.4445	-14.9052	0.24258		-216.201	-109.145	0.504831		-190.214	-10.6177	0.0558198		-87.4704	-10.1389	0.115912		-33.4679	-6.91762	0.206694		-69.8929	-14.5035	0.20751
	50	0.354143	0.0844545		-63.7467	-17.0548	0.26754		-208.511	-160.72	0.770799		-193.919	-62.0834	0.320151		-80.4379	-21.9052	0.272324		-39.4496	-8.47426	0.214812		-71.7666	-20.0393	0.279229
	75	0.461097	0.0933189		-63.7839	-18.923	0.296674		-217.04	-187.316	0.863048		-196.421	-116.679	0.594025		-82.9425	-27.1563	0.327411		-41.6912	-11.4788	0.275329		-70.8742	-29.0651	0.410094
	100	0.558049	0.0976179		-61.5368	-28.2726	0.459442		-217.694	-203.778	0.936075		-189.161	-131.086	0.692986		-85.1352	-31.4853	0.369827		-35.8454	-10.058	0.280594		-73.8267	-44.9875	0.609366
	125	0.624571	0.0940894		-57.9243	-28.3223	0.488954		-216.18	-201.776	0.93337		-193.23	-153.404	0.793893		-83.6442	-34.4498	0.411861		-34.085	-12.7227	0.373264		-69.708	-52.0078	0.746081
	150	0.730939	0.0883332		-53.1338	-29.9404	0.563491		-212.651	-216.526	1.01822		-194.919	-172.03	0.882572		-83.7001	-38.0763	0.454913		-38.8499	-24.2015	0.622949		-75.0699	-63.3206	0.843489
	175	0.76019	0.0943348		-56.7794	-26.1093	0.459838		-210.225	-207.967	0.989259		-191.512	-176.924	0.923827		-78.6225	-39.2243	0.498894		-32.1784	-24.3964	0.758161		-66.4957	-61.9181	0.931159
	200	0.812696	0.103534		-65.6764	-33.0226	0.502808		-217.23	-216.924	0.998591		-188.525	-173.175	0.918578		-85.2408	-40.2884	0.472642		-31.4563	-31.1511	0.990298		-67.9214	-67.4636	0.99326
	225	0.82193	0.104151		-62.4843	-29.5253	0.472523		-214.023	-217.075	1.01426		-184.683	-179.342	0.97108		-85.1883	-44.7525	0.525336		-38.2731	-34.6109	0.904314		-62.3229	-65.0694	1.04407
	250	0.868833	0.0837755		-59.9561	-43.0188	0.717505		-203.502	-211.924	1.04139		-190.668	-177.668	0.931819		-85.0372	-45.3949	0.533824		-39.4569	-42.0509	1.06574		-69.1071	-63.7665	0.92272
	275	0.847042	0.0641668		-54.8497	-37.6073	0.685643		-217.378	-215.913	0.993261		-201.9	-184.474	0.91369		-80.3346	-50.0612	0.623159		-40.4562	-35.4208	0.875535		-67.5611	-66.9508	0.990967
	300	0.84169	0.076311		-62.78	-37.603	0.598965		-215.032	-208.318	0.968777		-193.291	-185.784	0.961162		-82.4088	-49.6634	0.602647		-34.5576	-32.574	0.9426		-63.5521	-62.0262	0.97599
	325	0.831982	0.073468		-60.3161	-33.9184	0.562344		-207.726	-207.116	0.997063		-187.539	-178.598	0.952325		-85.1869	-56.3478	0.661461		-31.4971	-30.429	0.966089		-74.5384	-63.5521	0.852609
	350	0.854115	0.0739296		-62.6143	-36.6744	0.585719		-205.929	-208.736	1.01363		-192.137	-183.623	0.955688		-82.9388	-57.0904	0.688344		-34.3512	-29.4684	0.857856		-78.0751	-79.9061	1.02345
	375	0.941313	0.0807973		-55.8916	-38.6492	0.691503		-217.182	-222.339	1.02375		-188.222	-187.307	0.995139		-81.4509	-58.8984	0.723115		-34.8902	-42.2145	1.20992		-68.5662	-68.8714	1.00445
	400	0.945347	0.0691846		-51.1151	-33.4149	0.653719		-215.133	-214.371	0.996458		-186.021	-184.801	0.993442		-79.9997	-67.4875	0.843597		-40.8987	-44.7134	1.09327		-68.3036	-74.5597	1.09159
	425	0.845636	0.0682706		-59.2556	-41.0976	0.693565		-217.13	-215.085	0.990582		-178.855	-171.774	0.960409		-76.8239	-63.0605	0.820845		-40.6773	-24.6556	0.606127		-66.7178	-66.8703	1.00229
	450	0.908042	0.0380902		-61.7052	-45.3783	0.735405		-211.955	-207.652	0.979699		-178.622	-176.302	0.987012		-78.0299	-68.9051	0.88306		-33.6671	-30.7679	0.913886		-66.069	-62.7121	0.949191
	475	0.925719	0.0458926		-56.1523	-41.1987	0.733696		-211.491	-212.681	1.00563		-182.391	-178.057	0.976238		-81.401	-68.7667	0.844789		-30.0345	-30.4923	1.01524		-71.7166	-70.1907	0.978723
	500	0.916701	0.0386233		-58.1558	-45.1858	0.776978		-217.372	-225.123	1.03566		-188.155	-184.676	0.98151		-80.1368	-72.3853	0.903272		-35.5728	-30.0796	0.845579		-67.749	-64.8499	0.957208
	525	0.920515	0.0397057		-58.6474	-43.8463	0.747626		-213.135	-210.084	0.985685		-184.562	-175.804	0.952547		-79.4307	-72.8389	0.917012		-34.2528	-30.5907	0.893086		-67.4834	-69.3145	1.02713
	550	0.995304	0.0405826		-48.586	-41.7195	0.858673		-206.842	-220.514	1.0661		-180.383	-171.838	0.952629		-80.7026	-74.0497	0.917563		-31.6439	-33.9327	1.07233		-61.309	-67.7177	1.10453
	575	0.915248	0.0384849		-56.6643	-41.7107	0.736102		-214.245	-216.076	1.00855		-187.07	-173.001	0.924793		-81.284	-76.2792	0.938428		-35.6647	-34.5966	0.970052		-68.8479	-62.897	0.913565
	600	0.967218	0.0597472		-52.2097	-42.2915	0.810031		-215.281	-209.666	0.973918		-183.368	-180.652	0.985188		-79.1415	-70.4745	0.890487		-29.0316	-35.8981	1.23652		-67.3896	-61.1335	0.907165
	625	0.963288	0.0254354		-49.2679	-45.148	0.916378		-211.356	-215.69	1.02051		-178.539	-180.614	1.01162		-81.443	-71.4943	0.877845		-36.0701	-33.6287	0.932315		-65.1931	-66.5664	1.02107
	2 TARPS	A2:g2 + A4c	AGONIST: AMPA
	% Recovery				2018_10_23_0011-12				2018_10_23_0018-20				2018_10_23_0026-28				2018_10_23_0041-43				2018_10_26_0032-34
	TIME INTERVAL	AVERAGE	SEM		First Pulse	Second Pulse	% of Recovery		First Pulse	Second Pulse	% of Recovery		First Pulse	Second Pulse	% of Recovery		First Pulse	Second Pulse	% of Recovery		First Pulse	Second Pulse	% of Recovery
	25	0.25305	0.0226975		-14.2883	-4.67525	0.327208		-17.5312	-4.20515	0.239867		-6.21184	-1.6342	0.263078		-9.30857	-1.73004	0.185855		-9.65415	-2.40623	0.249243
	50	0.454302	0.0441842		-11.0814	-5.96966	0.53871		-17.677	-5.67347	0.320952		-5.3824	-2.02547	0.376314		-10.7572	-5.5692	0.517718		-6.17083	-3.19536	0.517817
	75	0.400161	0.0512531		-14.854	-5.16469	0.347697		-20.4234	-6.28362	0.307668		-5.34779	-2.49948	0.467386		-8.37518	-4.76393	0.568815		-8.06279	-2.49333	0.309239
	100	0.577453	0.0713951		-14.6891	-5.22865	0.355954		-19.3596	-9.23791	0.477175		-5.12982	-3.40049	0.662887		-9.3105	-5.9027	0.633983		-7.85782	-5.95047	0.757267
	125	0.693192	0.0314155		-11.8531	-7.35178	0.620241		-16.2247	-13.1221	0.808773		-4.36089	-2.9876	0.68509		-8.87456	-5.87367	0.661855		-7.13721	-4.92469	0.690002
	150	0.605689	0.0466461		-15.1071	-8.46954	0.560633		-18.9011	-9.59324	0.507549		-4.32038	-3.35399	0.776318		-11.4966	-6.41032	0.557584		-9.18862	-5.7554	0.626362
	175	0.688517	0.0585148		-10.4308	-7.98939	0.765942		-18.0271	-13.9072	0.771461		-5.23266	-2.9947	0.572309		-9.09375	-7.36442	0.809833		-8.47777	-4.43419	0.523037
	200	0.66973	0.0183828		-12.1609	-9.03284	0.742777		-18.3346	-11.8242	0.644912		-4.91073	-3.23226	0.658204		-9.64035	-6.28341	0.651782		-6.12057	-3.98434	0.650975
	225	0.921246	0.107721		-9.407	-11.4669	1.21898		-21.7013	-13.9193	0.641404		-6.55519	-4.67327	0.712911		-7.87	-7.66655	0.974149		-6.48849	-6.86996	1.05879
	250	0.829121	0.0714399		-11.6693	-10.1434	0.869238		-17.7163	-15.0206	0.847841		-6.45559	-4.06505	0.629695		-7.85792	-8.31568	1.05825		-7.35224	-5.44489	0.740576
	275	0.949356	0.068402		-13.9758	-13.8995	0.994541		-18.3323	-15.5857	0.850177		-4.60028	-5.26149	1.14373		-10.3205	-7.72655	0.74866		-7.88965	-7.96594	1.00967
	300	0.825181	0.0282629		-14.3964	-11.6498	0.809216		-20.494	-17.7983	0.868464		-4.39632	-3.7351	0.849597		-9.51852	-6.87366	0.722135		-8.03051	-7.03869	0.876494
	325	0.793437	0.0718492		-13.0414	-9.91334	0.760144		-18.8677	-14.4935	0.768165		-4.25703	-4.20617	0.988053		-10.1991	-9.08015	0.890289		-7.11788	-3.98982	0.560535
	350	0.921978	0.122539		-9.58334	-10.8803	1.13533		-21.9275	-13.0265	0.594071		-4.15571	-4.3038	1.03564		-10.2704	-6.81173	0.663239		-4.62104	-5.46027	1.18161
	375	0.868524	0.0453222		-11.9078	-11.0686	0.929525		-18.3013	-16.2159	0.886052		-5.27083	-4.55875	0.864902		-8.01092	-7.70574	0.961905		-4.07221	-2.85151	0.700236
	400	0.732637	0.0814531		-11.4311	-9.90527	0.866519		-19.4237	-16.2703	0.837652		-5.2954	-3.76952	0.711848		-9.48197	-7.80351	0.822984		-5.96235	-2.52912	0.424182
	425	0.910282	0.0839874		-15.505	-10.0882	0.650642		-17.8937	-20.9963	1.17339		-4.73784	-4.17835	0.88191		-10.7731	-9.50156	0.881971		-4.18033	-4.02774	0.963498
	450	0.823705	0.0593198		-15.4738	-10.5147	0.679516		-21.7641	-16.4236	0.754619		-4.53398	-4.58485	1.01122		-9.00106	-6.91569	0.76832		-5.61271	-5.07865	0.904848
	475	0.950809	0.0510267		-12.3904	-10.5593	0.852216		-18.3268	-17.0552	0.930615		-3.3816	-3.63592	1.07521		-9.44106	-7.86432	0.832991		-3.63211	-3.86099	1.06302
	500	1.10608	0.0601086		-10.7386	-13.4851	1.25576		-19.8419	-20.1471	1.01538		-4.24759	-4.5019	1.05987		-7.203	-8.93233	1.24008		-5.62672	-5.39783	0.959321
	525	1.0134	0.0689974		-15.2675	-13.1312	0.860075		-16.7165	-17.6829	1.05781		-4.76555	-4.61297	0.967983		-8.09721	-10.1826	1.25754		-3.99485	-3.68967	0.923607
	550	1.05127	0.159242		-14.6133	-10.4171	0.712851		-18.0665	-21.1691	1.17173		-4.30657	-4.0014	0.929139		-7.80503	-6.4826	0.830567		-3.49018	-5.62641	1.61207
	575	0.931466	0.0808907		-15.8323	-12.4754	0.787971		-21.2157	-16.6381	0.784235		-5.12677	-6.19489	1.20834		-8.81	-7.58929	0.86144		-4.97312	-5.04941	1.01534
	600	1.13174	0.161013		-11.4048	-9.34487	0.81938		-17.3017	-20.2009	1.16757		-5.48738	-6.4029	1.16684		-8.89446	-7.216	0.811292		-3.18973	-5.40225	1.69364
	625	1.23669	0.184673		-9.23903	-13.5878	1.4707		-23.5646	-19.0887	0.810058		-3.65673	-4.06363	1.11127		-7.70594	-7.40077	0.960398		-3.39683	-6.21971	1.83103
