# Supplementary material for: AMPAR/TARP stoichiometry differentially modulates channel properties
Source: eLife. 2020 May 26;9:e53946. doi: 10.7554/eLife.53946 (PMC7299370; doi:10.7554/eLife.53946)
Supplement: Figure 7—source data 1. [file elife-53946-fig7-data1.xlsx]

## Sheet: Figure 7E Conductance
	0 TARPs (A2+A4c)				2 TARPs (A2 + A4c:g2)				2 TARPs (A2:g2 + A4c )				4 TARPs (A2:g2 + A4c:g2 )				Cerebellar Granule Cells
	File	Conductance (pS)	RI		File	Conductance (pS)	RI		File	Conductance (pS)	RI		File	Conductance (pS)	RI		File	Conductance (pS)	RI
	2017_04_21_0007	4.02127	1.07293		2018_03_16_0003	4.46873	0.933595		2017_05_03_0035	12.2307	0.718153		2018_04_06_0007	15.8482	0.799364		2017_11_29_0003	14.5553	0.910178
	2017_05_03_0017	3.68127	0.940011		2018_03_29_0001	16.6822	1.29726		2017_05_03_0045	11.3218	1.29144		2018_04_06_0008	10.9313	0.916531		2017_11_29_0011	23.0345	0.930359
	2017_05_03_0025	6.38473	1.10255		2018_03_29_0006	10.3467	1.09584		2017_05_03_0064	19.61	1.50191		2018_04_06_0012	9.58036	0.904959		2017_11_29_0017	15.1251	0.993909
	2017_05_03_0087	5.88691	0.825905		2018_03_29_0012	21.4509	0.876533		2017_05_12_0024	23.5909	0.795561		2018_04_19_0002	15.9	0.965124		2017_12_07_0002	15.2033	0.892667
	2017_05_04_0041	6.75109	0.794096		2018_03_29_0022	6.66909	0.893573		2017_05_19_0021	15.2776	0.791033		2018_05_10_0010	10.0513	0.85133		2017_12_29_0015	5.83818	1.29852
	2017_05_04_0050	2.66073	1.11321		2018_04_06_0006	6.93236	0.895563		2017_05_19_0035	9.652	1.16916		2018_05_16_0004	18.8764	0.933061		2018_01_19_0006	15.0707	1.07418
	2017_05_09_0037	6.01091	0.881577		2018_05_10_0005	5.80436	1.07015		2017_05_23_0011	12.8287	1.59879		2018_05_16_0005	16.3056	0.773587		2018_01_22_0001	21.3473	0.739459
	2017_05_09_0056	4.43709	0.738396		2018_05_18_0003	8.59382	1.17247		2017_05_23_0032	11.3158	0.906868		2018_05_16_0014	9.34764	0.990462		2018_01_22_0005	13.0145	1.07067
	2017_05_19_0070	3.97091	1.32949		2018_05_18_0011	14.2409	1.37235		2018_09_06_0022	21.9309	0.787195		2018_05_16_0024	25.9236	0.792941		2018_01_22_0006	29.16	1.19588
	2017_05_10_0012	3.60455	0.961386		2018_05_18_0012	6.416	1.00399		2018_09_06_0028	20.7418	1.2983		2018_05_16_0034	12.7724	0.866532		2018_02_23_0007	15.6584	1.14621
	2017_06_13_0007	7.45109	0.769216		2018_05_18_0016	10.4384	1.08464		Mean	15.85			2018_05_16_0042	7.05455	0.985553		2018_02_23_0015	10.8604	0.712396
	2017_06_14_0034	3.28455	1.0479		2018_05_18_0017	5.96	1.46556		S.E.M.	1.62275			2018_05_18_0035	8.79691	0.965729		2018_02_26_0011	10.352	0.918528
	2017_06_14_0036	8.55509	0.887		2018_05_18_0018	3.74691	0.942495		N	10			2018_05_18_0036	12.7229	0.908898		2018_02_26_0013	24.16	0.9745
	Mean	5.13078			2018_05_18_0034	6.95927	1.18113						2018_06_21_0003	11.7945	1.05507		2018_02_26_0014	7.514	0.819174
	S.E.M.	0.50416			2018_06_20_0002	7.50636	1.07275						2018_06_21_0010	8.86109	0.701146		2018_02_26_0022	6.92055	0.710242
	N	13			2018_06_20_0021	18.8673	1.05939						2018_06_21_0015	10.9987	0.965365		2018_02_26_0023	4.58891	0.8536
					2018_09_17_0002	8.44145	1.57931						2018_06_21_0018	14.7916	0.918224		2018_02_26_0027	13.5022	0.808457
					2018_09_17_0003	13.3435	1.10456						2018_06_21_0020	3.53091	0.925203		2018_04_27_0003	13.08	0.964642
					2018_09_17_0008	6.24818	1.18118						2018_06_21_0028	9.20364	0.839698		Mean	14.3881
					2018_09_17_0016	11.2844	1.04483						2018_06_21_0030	18.1538	0.766523		S.E.M.	1.56082
					Mean	9.72004							Mean	12.5723			N	18
					S.E.M.	1.0941							S.E.M.	1.1156
					N	20							N	20
						STATISTICAL ANALYSIS
	STATISTICAL ANALYSIS					Ordinary one-way ANOVA with Newman-Keuls multiple comparisons post-hoc test
	Comparison	Test	p-value	Graphic		Comparison	Mean Diff.	Significant?	Summary
	CGC vs 2 TARPs A2	Student's t-test	0.5517	ns		CGC vs 2 TARPs A2	1.462	No	ns
	CGC vs 4 TARPs	Student's t-test	0.3432	ns		CGC vs 4 TARPs	-1.816	No	ns
	CGC vs 0 TARPs	Student's t-test	< 0.0001	****		CGC vs 0 TARPs	-9.258	Yes	****
	CGC vs 2 TARPs A4c	Student's t-test	0.0176	*		CGC vs 2 TARPs A4c	-4.668	Yes	*
	0 TARPs vs 2 TARPs A4c	Student's t-test	0.003	**		0 TARPs vs 2 TARPs A4c	-4.59	Yes	*
	0 TARPs vs 2 TARPs A2	Student's t-test	< 0.0001	****		0 TARPs vs 2 TARPs A2	-10.72	Yes	****
	0 TARPs vs 4 TARPs	Student's t-test	< 0.0001	****		0 TARPs vs 4 TARPs	-7.442	Yes	***
	2 TARPs A4c vs 2 TARPs A2	Student's t-test	0.0035	**		2 TARPs A4c vs 2 TARPs A2	-6.13	Yes	*
	2 TARPs A4c vs 4 TARPs	Student's t-test	0.0758	ns		2 TARPs A4c vs 4 TARPs	-2.852	No	ns
	2 TARPs A2 vs 4 TARPs	Student's t-test	0.1039	ns		2 TARPs A2 vs 4 TARPs	3.279	No	ns
						F Value = 9.288
						P Value < 0.0001
						Comparisons of Interest

## Sheet: Figure 7F Popen
	0 TARPs (A2+A4c)				2 TARPs (A2 + A4c:g2)				2 TARPs (A2:g2 + A4c )				4 TARPs (A2:g2 + A4c:g2 )				Cerebellar Granule Cells (CGC)
	File	Peak Open Probability	RI		File	Peak Open Probability	RI		File	Peak Open Probability	RI		File	Peak Open Probability	RI		File	Peak Open Probability	RI
	2017_04_21_0007	0.327994	1.07293		2018_03_29_0006	0.4167	1.09584		2017_05_03_0035	0.388642	0.718153		2018_04_06_0007	0.804217	0.799364		2017_11_29_0003	0.181773	0.910178
	2017_05_03_0017	0.708778	0.940011		2018_03_29_0012	0.630693	0.876533		2017_05_03_0045	0.271714	1.29144		2018_04_06_0008	0.605746	0.916531		2017_11_29_0011	0.8508	0.930359
	2017_05_03_0025	0.776345	1.10255		2018_04_06_0006	0.266507	0.895563		2017_05_03_0064	0.65	1.50191		2018_04_06_0012	0.598348	0.904959		2017_11_29_0017	0.115558	0.993909
	2017_05_03_0087	0.592117	0.825905		2018_05_18_0012	0.193987	1.00399		2017_05_12_0024	0.539817	0.795561		2018_04_19_0002	0.692868	0.965124		2018_01_19_0006	0.392761	1.07418
	2017_05_04_0041	0.411124	0.794096		2018_05_18_0017	0.447962	1.46556		2017_05_19_0021	0.320079	0.791033		2018_05_10_0010	0.375836	0.85133		2018_01_22_0001	0.479563	0.739459
	2017_05_04_0050	0.341751	1.11321		2018_05_18_0017	0.447962	1.46556		2017_05_19_0035	0.217645	1.16916		2018_05_16_0003	0.344935	0.793055		2018_01_22_0005	0.272948	1.07067
	2017_05_09_0037	0.443541	0.881577		2018_06_20_0002	0.62497	1.07275		2017_05_23_0011	0.755538	1.59879		2018_05_16_0004	0.753029	0.933061		2018_01_22_0006	0.421324	1.19588
	2017_05_09_0056	0.193943	0.738396		2018_06_20_0021	0.469069	1.05939		2017_05_23_0016	0.548222	1.35814		2018_05_16_0005	0.654269	0.773587		2018_02_23_0007	0.333455	1.14621
	2017_05_19_0070	0.645309	1.32949		2018_09_17_0002	0.303447	1.57931		2017_05_23_0032	0.963431	0.906868		2018_05_16_0014	0.59236	0.990462		2018_02_23_0015	0.227729	0.712396
	2017_05_10_0012	0.417814	0.961386		2018_09_17_0003	0.653085	1.10456		Mean	0.517232			2018_05_16_0024	0.625722	0.792941		2018_02_26_0013	0.601435	0.9745
	2017_06_13_0007	0.438657	0.769216		2018_09_17_0016	0.612173	1.04483		S.E.M.	0.0816851			2018_05_16_0034	0.465098	0.866532		2018_02_26_0023	0.595548	0.8536
	Mean	0.481579			Mean	0.460596			N	9			2018_05_16_0042	0.658696	0.985553		2018_04_27_0003	0.51161	0.964642
	S.E.M.	0.0535746			S.E.M.	0.0478391							2018_05_18_0035	0.275931	0.965729		Mean	0.415375
	N	11			N	11							2018_05_18_0036	0.460249	0.908898		S.E.M.	0.0601306
													2018_06_21_0003	0.558638	1.05507		N	12
													2018_06_21_0010	0.251652	0.701146
													2018_06_21_0015	0.786606	0.965365
													2018_06_21_0018	0.617254	0.918224
													2018_06_21_0020	0.73121	0.925203
													2018_06_21_0028	0.604027	0.839698
						STATISTICAL ANALYSIS							2018_06_21_0030	0.625406	0.766523
	STATISTICAL ANALYSIS					Ordinary one-way ANOVA with Newman-Keuls multiple comparisons post-hoc test							Mean	0.575338
	Comparison	Test	p-value	Graphic		Comparison	Mean Diff.	Significant?	Summary				S.E.M.	0.0345802
	CGC vs 0 TARPs	Student's t-test	0.4236	ns		CGC vs 0 TARPs	0.06682	No	ns				N	21
	CGC vs 2 TARPs A4c	Student's t-test	0.6017	ns		CGC vs 2 TARPs A4c	0.04482	No	ns
	CGC vs 2 TARPs A2	Student's t-test	0.3165	ns		CGC vs 2 TARPs A2	0.1028	No	ns
	CGC vs 4 TARPs	Student's t-test	0.0185	*		CGC vs 4 TARPs	0.1607	No	ns
	0 TARPs vs 2 TARPs A2	Student's t-test	0.7105	ns		0 TARPs vs 2 TARPs A2	-0.03596	No	ns
	0 TARPs vs 2 TARPs A4c	Student's t-test	0.733	ns		0 TARPs vs 2 TARPs A4c	0.022	No	ns
	0 TARPs vs 4 TARPs	Student's t-test	0.1376	ns		0 TARPs vs 4 TARPs	-0.0939	No	ns
	2 TARPs A4c vs 2 TARPs A2	Student's t-test	0.5133	ns		2 TARPs A4c vs 2 TARPs A2	-0.05796	No	ns
	2 TARPs A4c vs 4 TARPs	Student's t-test	0.0538	ns		2 TARPs A4c vs 4 TARPs	-0.1159	No	ns
	2 TARPs A2 vs 4 TARPs	Student's t-test	0.4428	ns		2 TARPs A2 vs 4 TARPs	-0.05794	No	ns
						F Value = 1.684
						P Value = 0.1658
						Comparisons of Interest

## Sheet: Figure 7G Desensitization
	0 TARPs (A2+A4c)				2 TARPs (A2 + A4c:g2)				2 TARPs (A2:g2 + A4c )				4 TARPs (A2:g2 + A4c:g2 )					Cerebellar Granule Cells (CGC)
	File	Desensitization weighted time constant (ms)	RI		File	Desensitization weighted time constant (ms)	RI		File	Desensitization weighted time constant (ms)	RI		File	Desensitization weighted time constant (ms)	RI		File	Desensitization weighted time constant (ms)	RI
	2017_04_21_0007	6.38282	1.07293		2018_03_16_0003	9.77759	0.933595		2017_05_03_0035	7.60005	0.718153		2018_04_06_0007	10.0249	0.799364		2017_11_29_0003	4.92767	0.910178
	2017_05_03_0017	6.11761	0.940011		2018_03_29_0001	10.5675	1.29726		2017_05_03_0045	6.97253	1.29144		2018_04_06_0008	9.21535	0.916531		2017_11_29_0011	6.38791	0.930359
	2017_05_03_0025	5.08862	1.10255		2018_03_29_0006	5.95135	1.09584		2017_05_03_0064	6.44811	1.50191		2018_04_06_0012	9.91886	0.904959		2017_11_29_0017	5.95724	0.993909
	2017_05_03_0087	4.78429	0.825905		2018_03_29_0012	6.16186	0.876533		2017_05_12_0024	4.943	0.795561		2018_04_19_0002	17.0697	0.965124		2017_12_07_0002	4.87294	0.892667
	2017_05_04_0041	4.54072	0.794096		2018_03_29_0022	10.8473	0.893573		2017_05_19_0021	4.91626	0.791033		2018_05_10_0010	8.02716	0.85133		2017_12_29_0015	3.95456	1.29852
	2017_05_04_0050	4.02087	1.11321		2018_04_06_0006	8.42634	0.895563		2017_05_19_0035	3.70615	1.16916		2018_05_16_0003	6.34527	0.793055		2018_01_19_0006	3.99792	1.07418
	2017_05_09_0037	3.32877	0.881577		2018_05_10_0004	4.86065	1.17003		2017_05_23_0011	5.20783	1.59879		2018_05_16_0004	6.87299	0.933061		2018_01_22_0001	4.77745	0.739459
	2017_05_09_0056	3.42296	0.738396		2018_05_10_0005	6.24577	1.07015		2017_05_23_0032	6.00921	0.906868		2018_05_16_0014	11.8568	0.990462		2018_01_22_0005	4.05671	1.07067
	2017_05_19_0068	5.7856	1.27522		2018_05_18_0003	7.08533	1.17247		2018_09_06_0010	4.24955	0.718807		2018_05_16_0024	4.85226	0.792941		2018_01_22_0006	4.45455	1.19588
	2017_05_19_0070	3.94681	1.32949		2018_05_18_0011	7.4599	1.37235		2018_09_06_0022	3.42482	0.787195		2018_05_16_0034	6.6826	0.866532		2018_02_23_0007	4.54642	1.14621
	2017_05_10_0012	6.02879	0.961386		2018_05_18_0012	7.43443	1.00399		2018_09_06_0028	6.18623	1.2983		2018_05_16_0042	10.0634	0.985553		2018_02_23_0011	7.69867	0.710009
	2017_06_13_0007	3.73567	0.769216		2018_05_18_0016	6.19655	1.08464		Mean	5.42398			2018_05_18_0035	7.78524	0.965729		2018_02_23_0015	5.46183	0.712396
	2017_06_14_0034	4.28443	1.0479		2018_05_18_0017	7.18902	1.46556		S.E.M.	0.404164			2018_05_18_0036	5.52716	0.908898		2018_02_26_0011	5.30336	0.918528
	2017_06_14_0036	5.19369	0.887		2018_05_18_0018	11.7089	0.942495		N	11			2018_06_21_0003	8.54174	1.05507		2018_02_26_0013	5.12318	0.9745
	Mean	4.76155			2018_05_18_0034	6.96169	1.18113						2018_06_21_0010	9.11745	0.701146		2018_02_26_0014	5.12866	0.819174
	S.E.M.	0.275384			2018_06_20_0002	4.43848	1.07275						2018_06_21_0015	6.22974	0.965365		2018_02_26_0022	6.47083	0.710242
	N	14			2018_06_20_0021	5.61024	1.05939						2018_06_21_0018	5.36237	0.918224		2018_02_26_0023	4.87902	0.8536
					2018_09_17_0002	6.24948	1.57931						2018_06_21_0020	8.80202	0.925203		2018_02_26_0027	4.28903	0.808457
					2018_09_17_0003	6.34028	1.10456						2018_06_21_0028	8.74677	0.839698		2018_04_27_0003	3.98989	0.964642
					2018_09_17_0008	5.67859	1.18118						2018_06_21_0030	7.51271	0.766523		Mean	5.06726
					2018_09_17_0016	6.58756	1.04483						Mean	8.42773			S.E.M.	0.227119
					Mean	7.22756							S.E.M.	0.611035			N	19
					S.E.M.	0.430419							N	20
					N	21
						STATISTICAL ANALYSIS
	STATISTICAL ANALYSIS					Ordinary one-way ANOVA with Newman-Keuls multiple comparisons post-hoc test
	Comparison	Test	p-value	Graphic		Comparison	Mean Diff.	Significant?	Summary
	CGC vs 0 TARPs	Mann Whithney U-test	0.3714	ns		CGC vs 0 TARPs	-0.3059	No	ns
	CGC vs 2 TARPs A4c	Mann Whithney U-test	< 0.0001	****		CGC vs 2 TARPs A4c	2.161	Yes	***
	CGC vs 2 TARPs A2	Mann Whithney U-test	0.4427	ns		CGC vs 2 TARPs A2	0.3566	No	ns
	CGC vs 4 TARPs	Mann Whithney U-test	< 0.0001	****		CGC vs 4 TARPs	3.361	Yes	****
	0 TARPs vs 4 TARPs	Mann Whitney U-test	< 0.0001	****		0 TARPs vs 4 TARPs	-3.667	Yes	****
	0 TARPs vs 2 TARPs A4c	Student's t-test	0.0001	***		0 TARPs vs 2 TARPs A4c	-2.467	Yes	***
	2 TARPs A4c vs 2 TARPs A2	Student's t-test	0.011	*		2 TARPs A4c vs 2 TARPs A2	1.805	Yes	**
	2 TARPs A2 vs 4 TARPs	Mann Whitney U-test	0.0004	***		2 TARPs A2 vs 4 TARPs	-3.004	Yes	****
	2 TARPs A4c vs 4 TARPs	Mann Whitney U-test	0.1035	ns		2 TARPs A4c vs 4 TARPs	-1.199	Yes	*
	0 TARPs vs 2 TARPs A2	Student's t-test	0.1753	ns		0 TARPs vs 2 TARPs A2	-0.6625	No	ns
						F Value = 13.48
						P Value < 0.0001
						Comparisons of Interest
