# Supplementary material for: AMPAR/TARP stoichiometry differentially modulates channel properties
Source: eLife journal article supplement (doi:10.7554/elife.53946), 2020-05-26
Supplement: supp [file elife-53946-supp-v1.zip]

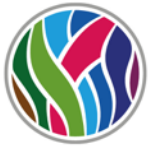

eLIFE

Westbrook Centre, Milton Road

Cambridge CB4 1YG

UK

P 01223 855340

W [elifesciences.org](http://elifesciences.org)

T @elife

## eLife's transparent reporting form

We encourage authors to provide detailed information *within their submission* to facilitate the interpretation and replication of experiments. Authors can upload supporting documentation to indicate the use of appropriate reporting guidelines for health-related research (see [EQUATOR Network](#)), life science research (see the [BioSharing Information Resource](#)), or the [ARRIVE guidelines](#) for reporting work involving animal research. Where applicable, authors should refer to any relevant reporting standards documents in this form.

If you have any questions, please consult our Journal Policies and/or contact us: [editorial@elifesciences.org](mailto:editorial@elifesciences.org).

### Sample-size estimation

- You should state whether an appropriate sample size was computed when the study was being designed
- You should state the statistical method of sample size computation and any required assumptions
- If no explicit power analysis was used, you should describe how you decided what sample (replicate) size (number) to use

Please outline where this information can be found within the submission (e.g., sections or figure legends), or explain why this information doesn't apply to your submission:

Sample sizes were not computed previously to the experimental procedure, but sample sizes for patch-clamp experiments were determined according to similar types of experiments performed previously in earlier published studies or in recent publications in the field.

### Replicates

- You should report how often each experiment was performed
- You should include a definition of biological versus technical replication
- The data obtained should be provided and sufficient information should be provided to indicate the number of independent biological and/or technical replicates
- If you encountered any outliers, you should describe how these were handled
- Criteria for exclusion/inclusion of data should be clearly stated
- High-throughput sequence data should be uploaded before submission, with a private link for reviewers provided (these are available from both GEO and ArrayExpress)

Please outline where this information can be found within the submission (e.g., sections or figure legends), or explain why this information doesn't apply to your submission:



Details on replicates as number of cells or days of experiments are provided in the Source Data Files associated to each figure. In addition, in most of the figures, single data points are plotted together with the mean and median. Data from CGCs are from 7 different cultures as specified on Source Data file – Figure 7. Data was analyzed for possible outliers using the GraphPad Outlier Calculator on line (<https://www.graphpad.com/quickcalcs/Grubbs1.cfm>) using the Grubbs' test with a significance level of 0.05 (Alpha). If Outliers were encountered, were removed from the data group. Importantly this test was run once per sample group.

### Statistical reporting

- Statistical analysis methods should be described and justified
- Raw data should be presented in figures whenever informative to do so (typically when N per group is less than 10)
- For each experiment, you should identify the statistical tests used, exact values of N, definitions of center, methods of multiple test correction, and dispersion and precision measures (e.g., mean, median, SD, SEM, confidence intervals; and, for the major substantive results, a measure of effect size (e.g., Pearson's r, Cohen's d)
- Report exact p-values wherever possible alongside the summary statistics and 95% confidence intervals. These should be reported for all key questions and not only when the p-value is less than 0.05.

Please outline where this information can be found within the submission (e.g., sections or figure legends), or explain why this information doesn't apply to your submission:

Statistical analysis methods used are specified in each experiment or in Source Data Files associated with each figure, as well as exact p values obtained. When relevant, p-values are reported in the Results text referring to each figure cited. Mean and SEM are reported in the text or figures or Source Data Files. Data analysis methods used are reported in the methods section and, in all cases, data has been analyzed similarly to common methods used in electrophysiology field.

(For large datasets, or papers with a very large number of statistical tests, you may upload a single table file with tests, Ns, etc., with reference to sections in the manuscript.)

### Group allocation

- Indicate how samples were allocated into experimental groups (in the case of clinical studies, please specify allocation to treatment method); if randomization was used, please also state if restricted randomization was applied
- Indicate if masking was used during group allocation, data collection and/or data analysis

Please outline where this information can be found within the submission (e.g., sections or figure legends), or explain why this information doesn't apply to your submission:

Patch-clamp experiments were performed in blind to the experimental conditions when possible. The use of different fluorescence reporters avoids in some occasions a complete blind in the recording. However, analysis of the recordings was performed in a blind manner.

### Additional data files (“source data”)



eLIFE

Westbrook Centre, Milton Road

Cambridge CB4 1YG

UK

P 01223 855340

W elifesciences.org

T @elife

- We encourage you to upload relevant additional data files, such as numerical data that are represented as a graph in a figure, or as a summary table
- Where provided, these should be in the most useful format, and they can be uploaded as “Source data” files linked to a main figure or table
- Include model definition files including the full list of parameters used
- Include code used for data analysis (e.g., R, MatLab)
- Avoid stating that data files are “available upon request”

Please indicate the figures or tables for which source data files have been provided:

Associated source data is provided for each figure in Excel files (.xlsx).
